# Supplementary material
Source: PubMed Central journal article supplement (PMC8132732)
Supplement: NIHMS1578951-supplement-Supp_1.pdf [file NIHMS1578951-supplement-Supp_1.pdf]

# Supplementary Materials for “Improved doubly robust estimation in learning optimal individualized treatment rules”

Yinghao Pan

Department of Mathematics and Statistics,  
University of North Carolina at Charlotte

and

Ying-Qi Zhao \*

Public Health Sciences Division, Fred Hutchinson Cancer Research Center

January 27, 2020

---

\*Contact: Ying-Qi Zhao, [yqzhao@fredhutch.org](mailto:yqzhao@fredhutch.org), Public Health Sciences Division, Fred Hutchinson Cancer Research Center, Seattle, WA 98109.

The supplementary materials contain five appendices. Appendix A provides proofs of Lemmas 1-3 and gives the asymptotic variance of various estimators under correctly specified propensity score model. Appendix B presents a general formula for the asymptotic variance of semiparametric M-estimators. This is a direct extension of Theorem 2 in Chen et al. (2003). Appendix C presents details of the Theorem 1 as well as the proofs. Appendix D presents details of the Theorem 2 as well as the proofs. Additional simulation results are reported in Appendix E.

## Appendix A: Proofs and derivations in Section 2 of the main paper

### A.1 Proof of Lemma 1

*Proof.* We show that when the propensity score is correct, i.e.,  $\pi(A, \mathbf{X}) = \pi_0(A, \mathbf{X})$ , the class of influence functions corresponding to estimators of the form (2) have the following expression

$$\frac{YI\{A = d(\mathbf{X})\}}{\pi_0\{d(\mathbf{X}), \mathbf{X}\}} - \frac{I\{A = d(\mathbf{X})\} - \pi_0\{d(\mathbf{X}), \mathbf{X}\}}{\pi_0\{d(\mathbf{X}), \mathbf{X}\}} Q\{\mathbf{X}, d(\mathbf{X}); \beta^*\} - V(d).$$

The technical details are as follows. Let  $\tilde{\beta}$  denote an intermediate value between  $\hat{\beta}$  and

$\beta^*$ , and  $Q_\beta(\mathbf{X}, A; \beta) \triangleq \partial Q(\mathbf{X}, A; \beta)/\partial \beta$ ,

$$\begin{aligned}
& \sqrt{n} \left\{ \widehat{V}(d; \hat{\beta}) - V(d) \right\} \\
= & \sqrt{n} \left\{ \frac{1}{n} \sum_{i=1}^n \left[ \frac{Y_i I\{A_i = d(\mathbf{X}_i)\}}{\pi_0\{d(\mathbf{X}_i), \mathbf{X}_i\}} - \frac{I\{A_i = d(\mathbf{X}_i)\} - \pi_0\{d(\mathbf{X}_i), \mathbf{X}_i\}}{\pi_0\{d(\mathbf{X}_i), \mathbf{X}_i\}} Q\{\mathbf{X}_i, d(\mathbf{X}_i); \hat{\beta}\} \right] - V(d) \right\} \\
= & \frac{1}{\sqrt{n}} \sum_{i=1}^n \left[ \frac{Y_i I\{A_i = d(\mathbf{X}_i)\}}{\pi_0\{d(\mathbf{X}_i), \mathbf{X}_i\}} - \frac{I\{A_i = d(\mathbf{X}_i)\} - \pi_0\{d(\mathbf{X}_i), \mathbf{X}_i\}}{\pi_0\{d(\mathbf{X}_i), \mathbf{X}_i\}} Q\{\mathbf{X}_i, d(\mathbf{X}_i); \beta^*\} - V(d) \right. \\
& \left. - \frac{I\{A_i = d(\mathbf{X}_i)\} - \pi_0\{d(\mathbf{X}_i), \mathbf{X}_i\}}{\pi_0\{d(\mathbf{X}_i), \mathbf{X}_i\}} Q_\beta\{\mathbf{X}_i, d(\mathbf{X}_i); \tilde{\beta}\} \cdot (\hat{\beta} - \beta^*) \right] \\
= & \frac{1}{\sqrt{n}} \sum_{i=1}^n \left[ \frac{Y_i I\{A_i = d(\mathbf{X}_i)\}}{\pi_0\{d(\mathbf{X}_i), \mathbf{X}_i\}} - \frac{I\{A_i = d(\mathbf{X}_i)\} - \pi_0\{d(\mathbf{X}_i), \mathbf{X}_i\}}{\pi_0\{d(\mathbf{X}_i), \mathbf{X}_i\}} Q\{\mathbf{X}_i, d(\mathbf{X}_i); \beta^*\} - V(d) \right] + o_p(1)
\end{aligned}$$

The third equality in the above comes from the fact that

$$\begin{aligned}
& \frac{1}{\sqrt{n}} \sum_{i=1}^n \frac{I\{A_i = d(\mathbf{X}_i)\} - \pi_0\{d(\mathbf{X}_i), \mathbf{X}_i\}}{\pi_0\{d(\mathbf{X}_i), \mathbf{X}_i\}} Q_\beta\{\mathbf{X}_i, d(\mathbf{X}_i); \tilde{\beta}\} \cdot (\hat{\beta} - \beta^*) \\
= & \sqrt{n}(\hat{\beta} - \beta^*) \cdot \frac{1}{n} \sum_{i=1}^n \frac{I\{A_i = d(\mathbf{X}_i)\} - \pi_0\{d(\mathbf{X}_i), \mathbf{X}_i\}}{\pi_0\{d(\mathbf{X}_i), \mathbf{X}_i\}} Q_\beta\{\mathbf{X}_i, d(\mathbf{X}_i); \tilde{\beta}\}
\end{aligned}$$

Since  $\sqrt{n}(\hat{\beta} - \beta^*) = O_p(1)$ , and note that

$$\begin{aligned}
& \frac{1}{n} \sum_{i=1}^n \frac{I\{A_i = d(\mathbf{X}_i)\} - \pi_0\{d(\mathbf{X}_i), \mathbf{X}_i\}}{\pi_0\{d(\mathbf{X}_i), \mathbf{X}_i\}} Q_\beta\{\mathbf{X}_i, d(\mathbf{X}_i); \tilde{\beta}\} \\
\stackrel{p}{\rightarrow} & E \left[ \frac{I\{A = d(\mathbf{X})\} - \pi_0\{d(\mathbf{X}), \mathbf{X}\}}{\pi_0\{d(\mathbf{X}), \mathbf{X}\}} Q_\beta\{\mathbf{X}, d(\mathbf{X}); \beta^*\} \right] \\
= & E \left\{ E \left[ \frac{I\{A = d(\mathbf{X})\} - \pi_0\{d(\mathbf{X}), \mathbf{X}\}}{\pi_0\{d(\mathbf{X}), \mathbf{X}\}} Q_\beta\{\mathbf{X}, d(\mathbf{X}); \beta^*\} \middle| \mathbf{X} \right] \right\} = 0,
\end{aligned}$$

we know that the whole term converges in probability to 0, and is thus negligible.  $\square$

## A.2 Derivation of term (I) in (4)

$$\begin{aligned}
& \text{Var} \left[ \frac{YI\{A = d(\mathbf{X})\}}{\pi_0\{d(\mathbf{X}), \mathbf{X}\}} - \frac{I\{A = d(\mathbf{X})\} - \pi_0\{d(\mathbf{X}), \mathbf{X}\}}{\pi_0\{d(\mathbf{X}), \mathbf{X}\}} Q\{\mathbf{X}, d(\mathbf{X}); \beta^*\} \middle| \mathbf{X} \right] \\
&= E \left( \left[ \frac{YI\{A = d(\mathbf{X})\}}{\pi_0\{d(\mathbf{X}), \mathbf{X}\}} - \frac{I\{A = d(\mathbf{X})\} - \pi_0\{d(\mathbf{X}), \mathbf{X}\}}{\pi_0\{d(\mathbf{X}), \mathbf{X}\}} Q\{\mathbf{X}, d(\mathbf{X}); \beta^*\} - Q_0\{\mathbf{X}, d(\mathbf{X})\} \right]^2 \middle| \mathbf{X} \right) \\
&= E \left\{ \left[ \frac{I\{A = d(\mathbf{X})\} - \pi_0\{d(\mathbf{X}), \mathbf{X}\}}{\pi_0\{d(\mathbf{X}), \mathbf{X}\}} \right]^2 Q^2\{\mathbf{X}, d(\mathbf{X}); \beta^*\} \middle| \mathbf{X} \right\} \\
&\quad - 2E \left( \frac{I\{A = d(\mathbf{X})\} - \pi_0\{d(\mathbf{X}), \mathbf{X}\}}{\pi_0\{d(\mathbf{X}), \mathbf{X}\}} \left[ \frac{YI\{A = d(\mathbf{X})\}}{\pi_0\{d(\mathbf{X}), \mathbf{X}\}} - Q_0\{\mathbf{X}, d(\mathbf{X})\} \right] Q\{\mathbf{X}, d(\mathbf{X}); \beta^*\} \middle| \mathbf{X} \right) \\
&\quad + E \left( \left[ \frac{YI\{A = d(\mathbf{X})\}}{\pi_0\{d(\mathbf{X}), \mathbf{X}\}} - Q_0\{\mathbf{X}, d(\mathbf{X})\} \right]^2 \middle| \mathbf{X} \right).
\end{aligned}$$

We know that

$$\begin{aligned}
& E \left\{ \frac{I\{A = d(\mathbf{X})\} - 2\pi_0\{d(\mathbf{X}), \mathbf{X}\}I\{A = d(\mathbf{X})\} + \pi_0^2\{d(\mathbf{X}), \mathbf{X}\}}{\pi_0^2\{d(\mathbf{X}), \mathbf{X}\}} \cdot Q^2\{\mathbf{X}, d(\mathbf{X}); \beta^*\} \middle| \mathbf{X} \right\} \\
&= \frac{1 - \pi_0\{d(\mathbf{X}), \mathbf{X}\}}{\pi_0\{d(\mathbf{X}), \mathbf{X}\}} Q^2\{\mathbf{X}, d(\mathbf{X}); \beta^*\},
\end{aligned}$$

and

$$\begin{aligned}
& E \left( \frac{I\{A = d(\mathbf{X})\} - \pi_0\{d(\mathbf{X}), \mathbf{X}\}}{\pi_0\{d(\mathbf{X}), \mathbf{X}\}} \left[ \frac{YI\{A = d(\mathbf{X})\}}{\pi_0\{d(\mathbf{X}), \mathbf{X}\}} - Q_0\{\mathbf{X}, d(\mathbf{X})\} \right] Q\{\mathbf{X}, d(\mathbf{X}); \beta^*\} \middle| \mathbf{X} \right) \\
&= E \left( \frac{YI\{A = d(\mathbf{X})\} [1 - \pi_0\{d(\mathbf{X}), \mathbf{X}\}]}{\pi_0^2\{d(\mathbf{X}), \mathbf{X}\}} Q\{\mathbf{X}, d(\mathbf{X}); \beta^*\} \middle| \mathbf{X} \right) \\
&\quad - E \left( \frac{I\{A = d(\mathbf{X})\} - \pi_0\{d(\mathbf{X}), \mathbf{X}\}}{\pi_0\{d(\mathbf{X}), \mathbf{X}\}} Q_0\{\mathbf{X}, d(\mathbf{X})\} \cdot Q\{\mathbf{X}, d(\mathbf{X}); \beta^*\} \middle| \mathbf{X} \right) \\
&= \frac{1 - \pi_0\{d(\mathbf{X}), \mathbf{X}\}}{\pi_0\{d(\mathbf{X}), \mathbf{X}\}} Q_0\{\mathbf{X}, d(\mathbf{X})\} \cdot Q\{\mathbf{X}, d(\mathbf{X}); \beta^*\}.
\end{aligned}$$

Therefore,

$$\begin{aligned}
& E \left( \text{Var} \left[ \frac{YI\{A = d(\mathbf{X})\}}{\pi_0\{d(\mathbf{X}), \mathbf{X}\}} - \frac{I\{A = d(\mathbf{X})\} - \pi_0\{d(\mathbf{X}), \mathbf{X}\}}{\pi_0\{d(\mathbf{X}), \mathbf{X}\}} Q\{\mathbf{X}, d(\mathbf{X}); \boldsymbol{\beta}^*\} \middle| \mathbf{X} \right] \right) \\
&= E \left[ \frac{1 - \pi_0\{d(\mathbf{X}), \mathbf{X}\}}{\pi_0\{d(\mathbf{X}), \mathbf{X}\}} Q^2\{\mathbf{X}, d(\mathbf{X}); \boldsymbol{\beta}^*\} \right] + E \left[ \frac{YI\{A = d(\mathbf{X})\}}{\pi_0\{d(\mathbf{X}), \mathbf{X}\}} - Q_0\{\mathbf{X}, d(\mathbf{X})\} \right]^2 \\
&\quad - 2E \left[ \frac{1 - \pi_0\{d(\mathbf{X}), \mathbf{X}\}}{\pi_0\{d(\mathbf{X}), \mathbf{X}\}} Q_0\{\mathbf{X}, d(\mathbf{X})\} \cdot Q\{\mathbf{X}, d(\mathbf{X}); \boldsymbol{\beta}^*\} \right].
\end{aligned}$$

### A.3 Proof of Lemma 2

*Proof.* When the propensity score is correct, i.e.,  $\pi(A, \mathbf{X}) = \pi_0(A, \mathbf{X})$ , we have shown that  $\hat{\boldsymbol{\beta}}^{\text{opt1}} \xrightarrow{P} \boldsymbol{\beta}^{\text{opt}}$ . It is straightforward to show that

$$\begin{aligned}
& \mathbb{P}_n \left[ \frac{I\{A = d(\mathbf{X})\} - \pi_0\{d(\mathbf{X}), \mathbf{X}\}}{\pi_0\{d(\mathbf{X}), \mathbf{X}\}} Q\{\mathbf{X}, d(\mathbf{X}); \hat{\boldsymbol{\beta}}^{\text{opt1}}\} \right] \\
&= \mathbb{P}_n \left[ \frac{I\{A = d(\mathbf{X})\} - \pi_0\{d(\mathbf{X}), \mathbf{X}\}}{\pi_0\{d(\mathbf{X}), \mathbf{X}\}} Q\{\mathbf{X}, d(\mathbf{X}); \boldsymbol{\beta}^{\text{opt}}\} \right] + o_p(1).
\end{aligned}$$

Hence,

$$\begin{aligned}
\widehat{V}(d; \hat{\boldsymbol{\beta}}^{\text{opt1}}) &= \mathbb{P}_n \left[ \frac{YI\{A = d(\mathbf{X})\}}{\pi_0\{d(\mathbf{X}), \mathbf{X}\}} - \frac{I\{A = d(\mathbf{X})\} - \pi_0\{d(\mathbf{X}), \mathbf{X}\}}{\pi_0\{d(\mathbf{X}), \mathbf{X}\}} Q\{\mathbf{X}, d(\mathbf{X}); \hat{\boldsymbol{\beta}}^{\text{opt1}}\} \right] \\
&= \mathbb{P}_n \left[ \frac{YI\{A = d(\mathbf{X})\}}{\pi_0\{d(\mathbf{X}), \mathbf{X}\}} \right] - \mathbb{P}_n \left[ \frac{I\{A = d(\mathbf{X})\} - \pi_0\{d(\mathbf{X}), \mathbf{X}\}}{\pi_0\{d(\mathbf{X}), \mathbf{X}\}} Q\{\mathbf{X}, d(\mathbf{X}); \boldsymbol{\beta}^{\text{opt}}\} \right] + o_p(1),
\end{aligned}$$

which converges to

$$V(d) - E \left[ \frac{I\{A = d(\mathbf{X})\} - \pi_0\{d(\mathbf{X}), \mathbf{X}\}}{\pi_0\{d(\mathbf{X}), \mathbf{X}\}} Q\{\mathbf{X}, d(\mathbf{X}); \boldsymbol{\beta}^{\text{opt}}\} \right] = V(d).$$

Here we have used the fact that  $E[I\{A = d(\mathbf{X})\} | \mathbf{X}] = P\{A = d(\mathbf{X}) | \mathbf{X}\} = \pi_0\{d(\mathbf{X}), \mathbf{X}\}$ .

When the outcome model is correct, i.e.,  $Q(\mathbf{X}, A; \boldsymbol{\beta}_0) = Q_0(\mathbf{X}, A)$  for some  $\boldsymbol{\beta}_0$ , but the

propensity score may not be,  $\pi(A, \mathbf{X}) \neq \pi_0(A, \mathbf{X})$ , we have shown that  $\hat{\beta}^{\text{opt1}} \xrightarrow{p} \beta_0$ .

$$\begin{aligned} & \mathbb{P}_n \left[ \frac{I\{A = d(\mathbf{X})\} - \pi\{d(\mathbf{X}), \mathbf{X}\}}{\pi\{d(\mathbf{X}), \mathbf{X}\}} Q\{\mathbf{X}, d(\mathbf{X}); \hat{\beta}^{\text{opt1}}\} \right] \\ = & \mathbb{P}_n \left[ \frac{I\{A = d(\mathbf{X})\} - \pi\{d(\mathbf{X}), \mathbf{X}\}}{\pi\{d(\mathbf{X}), \mathbf{X}\}} Q\{\mathbf{X}, d(\mathbf{X}); \beta_0\} \right] \\ & + \mathbb{P}_n \left[ \frac{I\{A = d(\mathbf{X})\} - \pi\{d(\mathbf{X}), \mathbf{X}\}}{\pi\{d(\mathbf{X}), \mathbf{X}\}} Q_{\beta}\{\mathbf{X}, d(\mathbf{X}); \tilde{\beta}\} \cdot (\hat{\beta}^{\text{opt1}} - \beta_0) \right], \end{aligned}$$

where  $\tilde{\beta}$  is an intermediate value between  $\hat{\beta}^{\text{opt1}}$  and  $\beta_0$ . The second term is  $o_p(1)$  after assuming that  $E \left[ \frac{I\{A=d(\mathbf{X})\} - \pi\{d(\mathbf{X}), \mathbf{X}\}}{\pi\{d(\mathbf{X}), \mathbf{X}\}} Q_{\beta}\{\mathbf{X}, d(\mathbf{X}); \beta_0\} \right]$  is finite. Thus,  $\widehat{V}(d; \hat{\beta}^{\text{opt1}})$  equals

$$\mathbb{P}_n \left[ \frac{Y I\{A = d(\mathbf{X})\}}{\pi\{d(\mathbf{X}), \mathbf{X}\}} - \frac{I\{A = d(\mathbf{X})\} - \pi\{d(\mathbf{X}), \mathbf{X}\}}{\pi\{d(\mathbf{X}), \mathbf{X}\}} Q\{\mathbf{X}, d(\mathbf{X}); \beta_0\} \right] + o_p(1),$$

which converges to

$$E \left( \frac{I\{A = d(\mathbf{X})\} [Y - Q_0\{\mathbf{X}, d(\mathbf{X})\}]}{\pi\{d(\mathbf{X}), \mathbf{X}\}} \right) + E [Q_0\{\mathbf{X}, d(\mathbf{X})\}].$$

The first term in the above equation is zero because  $E [I\{A = d(\mathbf{X})\} \cdot Y \mid \mathbf{X}, A] = I\{A = d(\mathbf{X})\} Q_0\{\mathbf{X}, d(\mathbf{X})\}$ . The second term is equal to  $V(d)$ . Thus,  $\widehat{V}(d; \hat{\beta}^{\text{opt1}}) \xrightarrow{p} V(d)$  when the outcome model is correctly specified.

Since  $\hat{\beta}^{\text{opt1}} \xrightarrow{p} \beta^{\text{opt}}$  when the propensity score is correct, by definition of  $\beta^{\text{opt}}$ , it is trivial that  $\widehat{V}(d; \hat{\beta}^{\text{opt1}})$  achieves the smallest variance among class of estimators (2).  $\square$

## A.4 Proof of Lemma 3

We first introduce the ‘generalized product kernels’ from Racine and Li (2004). For the  $i$ th subject, let  $\mathbf{X}_i = (\mathbf{X}_i^d, \mathbf{X}_i^c)$ , where  $\mathbf{X}_i^d$  denote a  $k \times 1$  vector of discrete variables and  $\mathbf{X}_i^c \in \mathbb{R}^p$  denote the remaining continuous variables. We use  $X_{t,i}^d$  to denote the  $t$ th component of  $\mathbf{X}_i^d$ . For any particular  $\mathbf{x}^d$  whose  $t$ th component is  $x_t^d$ , Racine and Li (2004)

defined the following kernel

$$l(X_{t,i}^d, x_t^d, \lambda) = \begin{cases} 1 & \text{if } X_{t,i}^d = x_t^d \\ \lambda & \text{if } X_{t,i}^d \neq x_t^d. \end{cases}$$

Then the product kernel for the discrete variables can be defined as  $L(\mathbf{X}_i^d, \mathbf{x}^d, \lambda) = \prod_{t=1}^k l(X_{t,i}^d, x_t^d, \lambda)$ . Let  $W\{\cdot\}$  denote the kernel function associated with the continuous variables  $\mathbf{x}^c$  and  $h$  to denote the smoothing parameters for the continuous variables. The product kernel for both continuous and discrete variables is  $K_{h,ix} = W_{h,ix}L_{\lambda,ix}$ , where  $W_{h,ix} = h^{-p}W\{(\mathbf{X}_i^c - \mathbf{x}^c)/h\}$  and  $L_{\lambda,ix} = L(\mathbf{X}_i^d, \mathbf{x}^d, \lambda)$ .

The  $Q$  function  $Q_0(\mathbf{X}, 1) = E(Y | \mathbf{X}, A = 1)$  and  $Q_0(\mathbf{X}, -1) = E(Y | \mathbf{X}, A = -1)$  will be estimated by

$$\hat{Q}_0(\mathbf{X}, 1) = \frac{\sum_{i=1}^n Y_i I(A_i = 1) K_{h,ix}}{\sum_{i=1}^n I(A_i = 1) K_{h,ix}}, \quad \hat{Q}_0(\mathbf{X}, -1) = \frac{\sum_{i=1}^n Y_i I(A_i = -1) K_{h,ix}}{\sum_{i=1}^n I(A_i = -1) K_{h,ix}}.$$

It is well known that for kernel regression with only continuous variables, the estimator is consistent as long as  $h \rightarrow 0$  and  $nh^p \rightarrow \infty$  as  $n \rightarrow \infty$ . When all the variables are discrete, we need  $\lambda \rightarrow 0$ . Thus,  $\hat{Q}_0(\mathbf{X}, 1)$  and  $\hat{Q}_0(\mathbf{X}, -1)$  are consistent estimators for  $Q_0(\mathbf{X}, 1)$  and  $Q_0(\mathbf{X}, -1)$  if two sets of conditions are satisfied.

Recall that  $\hat{\beta}^{\text{opt}2}$  is the solution to

$$(*) - \mathbb{P}_n \left( \frac{I\{A = d(\mathbf{X})\} - \pi\{d(\mathbf{X}), \mathbf{X}\}}{\pi\{d(\mathbf{X}), \mathbf{X}\}} \cdot \frac{1 - \pi\{d(\mathbf{X}), \mathbf{X}\}}{\pi\{d(\mathbf{X}), \mathbf{X}\}} \left[ \hat{Q}_0\{\mathbf{X}, d(\mathbf{X})\} - Q\{\mathbf{X}, d(\mathbf{X}); \beta\} \right] Q_\beta\{\mathbf{X}, d(\mathbf{X}); \beta\} \right) = 0. \quad (\text{S.1})$$

where

$$(*) = \mathbb{P}_n \left( \frac{I\{A = d(\mathbf{X})\}}{\pi\{d(\mathbf{X}), \mathbf{X}\}} \cdot \frac{1 - \pi\{d(\mathbf{X}), \mathbf{X}\}}{\pi\{d(\mathbf{X}), \mathbf{X}\}} \left[ Y - Q\{\mathbf{X}, d(\mathbf{X}); \beta\} \right] Q_\beta\{\mathbf{X}, d(\mathbf{X}); \beta\} \right).$$

When the propensity score is correct, the left-hand side of (S.1) converges in probability to

$$\begin{aligned} & E \left( \frac{I\{A = d(\mathbf{X})\}}{\pi_0\{d(\mathbf{X}), \mathbf{X}\}} \cdot \frac{1 - \pi_0\{d(\mathbf{X}), \mathbf{X}\}}{\pi_0\{d(\mathbf{X}), \mathbf{X}\}} \left[ Y - Q\{\mathbf{X}, d(\mathbf{X}); \boldsymbol{\beta}\} \right] Q_{\boldsymbol{\beta}}\{\mathbf{X}, d(\mathbf{X}); \boldsymbol{\beta}\} \right) \\ &= E \left( \frac{1 - \pi_0\{d(\mathbf{X}), \mathbf{X}\}}{\pi_0\{d(\mathbf{X}), \mathbf{X}\}} \left[ Q_0\{\mathbf{X}, d(\mathbf{X})\} - Q\{\mathbf{X}, d(\mathbf{X}); \boldsymbol{\beta}\} \right] Q_{\boldsymbol{\beta}}\{\mathbf{X}, d(\mathbf{X}); \boldsymbol{\beta}\} \right). \end{aligned}$$

Hence,  $\hat{\boldsymbol{\beta}}^{\text{opt2}} \xrightarrow{p} \boldsymbol{\beta}^{\text{opt}}$ . On the other hand, based on the fact that  $\widehat{Q}_0\{\mathbf{X}, d(\mathbf{X})\}$  is consistent for  $Q_0\{\mathbf{X}, d(\mathbf{X})\}$ , when the outcome regression model is correct but propensity score may not be, the left-hand side of (S.1) converges in probability to

$$\begin{aligned} & E \left( \frac{\pi_0\{d(\mathbf{X}), \mathbf{X}\} [1 - \pi\{d(\mathbf{X}), \mathbf{X}\}]}{\pi^2\{d(\mathbf{X}), \mathbf{X}\}} \left[ Q_0\{\mathbf{X}, d(\mathbf{X})\} - Q\{\mathbf{X}, d(\mathbf{X}); \boldsymbol{\beta}\} \right] Q_{\boldsymbol{\beta}}\{\mathbf{X}, d(\mathbf{X}); \boldsymbol{\beta}\} \right. \\ & \quad \left. - \frac{[\pi_0\{d(\mathbf{X}), \mathbf{X}\} - \pi\{d(\mathbf{X}), \mathbf{X}\}] [1 - \pi\{d(\mathbf{X}), \mathbf{X}\}]}{\pi^2\{d(\mathbf{X}), \mathbf{X}\}} \left[ Q_0\{\mathbf{X}, d(\mathbf{X})\} - Q\{\mathbf{X}, d(\mathbf{X}); \boldsymbol{\beta}\} \right] Q_{\boldsymbol{\beta}}\{\mathbf{X}, d(\mathbf{X}); \boldsymbol{\beta}\} \right) \\ &= E \left( \frac{1 - \pi\{d(\mathbf{X}), \mathbf{X}\}}{\pi\{d(\mathbf{X}), \mathbf{X}\}} \left[ Q_0\{\mathbf{X}, d(\mathbf{X})\} - Q\{\mathbf{X}, d(\mathbf{X}); \boldsymbol{\beta}\} \right] Q_{\boldsymbol{\beta}}\{\mathbf{X}, d(\mathbf{X}); \boldsymbol{\beta}\} \right) \end{aligned}$$

which equals 0 when  $\boldsymbol{\beta} = \boldsymbol{\beta}_0$ . Thus,  $\hat{\boldsymbol{\beta}}^{\text{opt2}} \xrightarrow{p} \boldsymbol{\beta}_0$ . These two facts ensure that  $\widehat{V}(d; \hat{\boldsymbol{\beta}}^{\text{opt2}})$  is doubly robust and achieves the smallest asymptotic variance among the class of DR estimators. That is to say,  $\widehat{V}(d; \hat{\boldsymbol{\beta}}^{\text{opt2}})$  is improved DR.



## A.5 Influence functions of (1) under correctly specified propensity score model

The detailed derivations are the following. When the propensity score model is correctly specified,

$$\begin{aligned}
& \sqrt{n} \left\{ \widehat{V}(d; \hat{\gamma}, \hat{\beta}) - V(d) \right\} \\
&= \sqrt{n} \left( \frac{1}{n} \sum_{i=1}^n \left[ \frac{Y_i I\{A_i = d(\mathbf{X}_i)\}}{\pi\{d(\mathbf{X}_i), \mathbf{X}_i; \hat{\gamma}\}} - \frac{I\{A_i = d(\mathbf{X}_i)\} - \pi\{d(\mathbf{X}_i), \mathbf{X}_i; \hat{\gamma}\}}{\pi\{d(\mathbf{X}_i), \mathbf{X}_i; \hat{\gamma}\}} Q\{\mathbf{X}_i, d(\mathbf{X}_i); \hat{\beta}\} \right] - V(d) \right) \\
&= \frac{1}{\sqrt{n}} \sum_{i=1}^n \left[ \frac{Y_i I\{A_i = d(\mathbf{X}_i)\}}{\pi\{d(\mathbf{X}_i), \mathbf{X}_i; \hat{\gamma}\}} - \frac{I\{A_i = d(\mathbf{X}_i)\} - \pi\{d(\mathbf{X}_i), \mathbf{X}_i; \hat{\gamma}\}}{\pi\{d(\mathbf{X}_i), \mathbf{X}_i; \hat{\gamma}\}} Q\{\mathbf{X}_i, d(\mathbf{X}_i); \beta^*\} - V(d) \right] + o_p(1)
\end{aligned}$$

Now we expand  $\hat{\gamma}$  about  $\gamma_0$  to obtain

$$\begin{aligned}
\sqrt{n} \left\{ \widehat{V}(d; \hat{\gamma}, \hat{\beta}) - V(d) \right\} &= \frac{1}{\sqrt{n}} \sum_{i=1}^n \tilde{\varphi}(Y_i, A_i, \mathbf{X}_i, \gamma_0, \beta^*) \\
&+ \left\{ \frac{1}{n} \sum_{i=1}^n \frac{\partial \tilde{\varphi}(Y_i, A_i, \mathbf{X}_i, \gamma_n^*, \beta^*)}{\partial \gamma^\top} \right\} \sqrt{n}(\hat{\gamma} - \gamma_0) + o_p(1),
\end{aligned} \tag{S.2}$$

where  $\gamma_n^*$  is some intermediate value between  $\hat{\gamma}$  and  $\gamma_0$ . Since under regularity conditions,  $\gamma_n^*$  converges in probability to  $\gamma_0$ , we obtain

$$\frac{1}{n} \sum_{i=1}^n \frac{\partial \tilde{\varphi}(Y_i, A_i, \mathbf{X}_i, \gamma_n^*, \beta^*)}{\partial \gamma^\top} \xrightarrow{p} E \left\{ \frac{\partial \tilde{\varphi}(Y_i, A_i, \mathbf{X}_i, \gamma_0, \beta^*)}{\partial \gamma^\top} \right\}. \tag{S.3}$$

Using standard results from finite-dimensional parametric models, we know that

$$\sqrt{n}(\hat{\gamma} - \gamma_0) = \frac{1}{\sqrt{n}} \sum_{i=1}^n \left[ E \left\{ S_\gamma(A_i, \mathbf{X}_i, \gamma_0) S_\gamma^\top(A_i, \mathbf{X}_i, \gamma_0) \right\} \right]^{-1} S_\gamma(A_i, \mathbf{X}_i, \gamma_0) + o_p(1). \tag{S.4}$$

Combing equations (S.4) and (S.3), we deduce that (S.2) is

$$\begin{aligned} & \sqrt{n} \left\{ \widehat{V}(d; \hat{\boldsymbol{\gamma}}, \hat{\boldsymbol{\beta}}) - V(d) \right\} \\ = & \frac{1}{\sqrt{n}} \sum_{i=1}^n \left( \tilde{\varphi}(Y_i, A_i, \mathbf{X}_i, \boldsymbol{\gamma}_0, \boldsymbol{\beta}^*) \right. \\ & \left. + E \left\{ \frac{\partial \tilde{\varphi}(Y_i, A_i, \mathbf{X}_i, \boldsymbol{\gamma}_0, \boldsymbol{\beta}^*)}{\partial \boldsymbol{\gamma}^\top} \right\} \left[ E \left\{ S_\gamma(A_i, \mathbf{X}_i, \boldsymbol{\gamma}_0) S_\gamma^\top(A_i, \mathbf{X}_i, \boldsymbol{\gamma}_0) \right\} \right]^{-1} S_\gamma(A_i, \mathbf{X}_i, \boldsymbol{\gamma}_0) \right) + o_p(1). \end{aligned}$$

Thus, the influence function is

$$\tilde{\varphi}(Y, A, \mathbf{X}, \boldsymbol{\gamma}_0, \boldsymbol{\beta}^*) + E \left\{ \frac{\partial \tilde{\varphi}(Y, A, \mathbf{X}, \boldsymbol{\gamma}_0, \boldsymbol{\beta}^*)}{\partial \boldsymbol{\gamma}^\top} \right\} \left[ E \left\{ S_\gamma(A, \mathbf{X}, \boldsymbol{\gamma}_0) S_\gamma^\top(A, \mathbf{X}, \boldsymbol{\gamma}_0) \right\} \right]^{-1} S_\gamma(A, \mathbf{X}, \boldsymbol{\gamma}_0).$$

## A.6 Variance of (7) and its minimizer

We know that  $\pi\{d(\mathbf{X}), \mathbf{X}; \boldsymbol{\gamma}\} = I\{d(\mathbf{X}) = 1\}\pi\{1, \mathbf{X}; \boldsymbol{\gamma}\} + I\{d(\mathbf{X}) = -1\}\pi\{-1, \mathbf{X}; \boldsymbol{\gamma}\}$ .

Hence,

$$\pi_\gamma\{d(\mathbf{X}), \mathbf{X}; \boldsymbol{\gamma}\} = \frac{\partial \pi\{d(\mathbf{X}), \mathbf{X}; \boldsymbol{\gamma}\}}{\partial \boldsymbol{\gamma}} = I\{d(\mathbf{X}) = 1\} \cdot \frac{\pi\{1, \mathbf{X}; \boldsymbol{\gamma}\}}{\partial \boldsymbol{\gamma}} - I\{d(\mathbf{X}) = -1\} \cdot \frac{\pi\{-1, \mathbf{X}; \boldsymbol{\gamma}\}}{\partial \boldsymbol{\gamma}}.$$

To suppress notations, we define  $R \triangleq I\{A = d(\mathbf{X})\}$ . Observe that

$$\begin{aligned} S_\gamma(A, \mathbf{X}, \boldsymbol{\gamma}) &= I(A = 1) \frac{\pi_\gamma(1, \mathbf{X}; \boldsymbol{\gamma})}{\pi(1, \mathbf{X}; \boldsymbol{\gamma})} - I(A = -1) \frac{\pi_\gamma(-1, \mathbf{X}; \boldsymbol{\gamma})}{1 - \pi(1, \mathbf{X}; \boldsymbol{\gamma})} \\ &= I\{A = d(\mathbf{X})\} \frac{\pi_\gamma\{d(\mathbf{X}), \mathbf{X}; \boldsymbol{\gamma}\}}{\pi\{d(\mathbf{X}), \mathbf{X}; \boldsymbol{\gamma}\}} - I\{A \neq d(\mathbf{X})\} \frac{\pi_\gamma\{d(\mathbf{X}), \mathbf{X}; \boldsymbol{\gamma}\}}{1 - \pi\{d(\mathbf{X}), \mathbf{X}; \boldsymbol{\gamma}\}} \\ &= \frac{R - \pi\{d(\mathbf{X}), \mathbf{X}; \boldsymbol{\gamma}\}}{\pi\{d(\mathbf{X}), \mathbf{X}; \boldsymbol{\gamma}\} [1 - \pi\{d(\mathbf{X}), \mathbf{X}; \boldsymbol{\gamma}\}]} \pi_\gamma\{d(\mathbf{X}), \mathbf{X}; \boldsymbol{\gamma}\}. \end{aligned}$$

The influence function (7) can be rewritten as

$$\frac{RY}{\pi_0\{d(\mathbf{X}), \mathbf{X}\}} - \frac{R - \pi_0\{d(\mathbf{X}), \mathbf{X}\}}{\pi_0\{d(\mathbf{X}), \mathbf{X}\}} \left[ Q\{\mathbf{X}, d(\mathbf{X}); \boldsymbol{\beta}^*\} + \Gamma_0(\boldsymbol{\beta}^*) \Sigma_{\boldsymbol{\gamma}\boldsymbol{\gamma}, 0}^{-1} \cdot \frac{\pi_\gamma\{d(\mathbf{X}), \mathbf{X}; \boldsymbol{\gamma}_0\}}{1 - \pi_0\{d(\mathbf{X}), \mathbf{X}\}} \right] - V(d).$$

We use the formula  $\text{Var}(\cdot) = E\{\text{Var}(\cdot | X)\} + \text{Var}\{E(\cdot | X)\}$ . It is obvious that

$$\begin{aligned} & E \left( \frac{RY}{\pi_0\{d(\mathbf{X}), \mathbf{X}\}} - \frac{R - \pi_0\{d(\mathbf{X}), \mathbf{X}\}}{\pi_0\{d(\mathbf{X}), \mathbf{X}\}} \left[ Q\{\mathbf{X}, d(\mathbf{X}); \boldsymbol{\beta}^*\} + \Gamma_0(\boldsymbol{\beta}^*)\Sigma_{\gamma\gamma,0}^{-1} \cdot \frac{\pi_\gamma\{d(\mathbf{X}), \mathbf{X}; \gamma_0\}}{1 - \pi_0\{d(\mathbf{X}), \mathbf{X}\}} \right] \middle| \mathbf{X} \right) \\ &= E \left[ \frac{RY}{\pi_0\{d(\mathbf{X}), \mathbf{X}\}} \middle| \mathbf{X} \right] = Q_0\{\mathbf{X}, d(\mathbf{X})\}. \end{aligned}$$

Hence, the second term is  $\text{Var}[Q_0\{\mathbf{X}, d(\mathbf{X})\}]$ , not relevant to  $\boldsymbol{\beta}^*$ .

$$\begin{aligned} & \text{Var} \left( \frac{RY}{\pi_0\{d(\mathbf{X}), \mathbf{X}\}} - \frac{R - \pi_0\{d(\mathbf{X}), \mathbf{X}\}}{\pi_0\{d(\mathbf{X}), \mathbf{X}\}} \left[ Q\{\mathbf{X}, d(\mathbf{X}); \boldsymbol{\beta}^*\} + \Gamma_0(\boldsymbol{\beta}^*)\Sigma_{\gamma\gamma,0}^{-1} \cdot \frac{\pi_\gamma\{d(\mathbf{X}), \mathbf{X}; \gamma_0\}}{1 - \pi_0\{d(\mathbf{X}), \mathbf{X}\}} \right] \middle| \mathbf{X} \right) \\ &= E \left[ \left( \frac{RY}{\pi_0\{d(\mathbf{X}), \mathbf{X}\}} - Q_0\{\mathbf{X}, d(\mathbf{X})\} \right. \right. \\ & \quad \left. \left. - \frac{R - \pi_0\{d(\mathbf{X}), \mathbf{X}\}}{\pi_0\{d(\mathbf{X}), \mathbf{X}\}} \left[ Q\{\mathbf{X}, d(\mathbf{X}); \boldsymbol{\beta}^*\} + \Gamma_0(\boldsymbol{\beta}^*)\Sigma_{\gamma\gamma,0}^{-1} \cdot \frac{\pi_\gamma\{d(\mathbf{X}), \mathbf{X}; \gamma_0\}}{1 - \pi_0\{d(\mathbf{X}), \mathbf{X}\}} \right] \right)^2 \middle| \mathbf{X} \right] \\ &= B_1 + B_2 + B_3, \end{aligned}$$

where

$$B_1 = E \left( \left[ \frac{R - \pi_0\{d(\mathbf{X}), \mathbf{X}\}}{\pi_0\{d(\mathbf{X}), \mathbf{X}\}} \right]^2 \left[ Q\{\mathbf{X}, d(\mathbf{X}); \boldsymbol{\beta}^*\} + \Gamma_0(\boldsymbol{\beta}^*)\Sigma_{\gamma\gamma,0}^{-1} \cdot \frac{\pi_\gamma\{d(\mathbf{X}), \mathbf{X}; \gamma_0\}}{1 - \pi_0\{d(\mathbf{X}), \mathbf{X}\}} \right]^2 \middle| \mathbf{X} \right),$$

$$\begin{aligned} B_2 = -2E \left( \frac{R - \pi_0\{d(\mathbf{X}), \mathbf{X}\}}{\pi_0\{d(\mathbf{X}), \mathbf{X}\}} \cdot \left[ \frac{RY}{\pi_0\{d(\mathbf{X}), \mathbf{X}\}} - Q_0\{\mathbf{X}, d(\mathbf{X})\} \right] \right. \\ \left. \cdot \left[ Q\{\mathbf{X}, d(\mathbf{X}); \boldsymbol{\beta}^*\} + \Gamma_0(\boldsymbol{\beta}^*)\Sigma_{\gamma\gamma,0}^{-1} \cdot \frac{\pi_\gamma\{d(\mathbf{X}), \mathbf{X}; \gamma_0\}}{1 - \pi_0\{d(\mathbf{X}), \mathbf{X}\}} \right] \middle| \mathbf{X} \right), \end{aligned}$$

$$B_3 = E \left( \left[ \frac{RY}{\pi_0\{d(\mathbf{X}), \mathbf{X}\}} - Q_0\{\mathbf{X}, d(\mathbf{X})\} \right]^2 \middle| \mathbf{X} \right).$$

After some calculations, it can be shown that

$$B_1 = \frac{1 - \pi_0\{d(\mathbf{X}), \mathbf{X}\}}{\pi_0\{d(\mathbf{X}), \mathbf{X}\}} \left[ Q\{\mathbf{X}, d(\mathbf{X}); \boldsymbol{\beta}^*\} + \Gamma_0(\boldsymbol{\beta}^*)\Sigma_{\gamma\gamma,0}^{-1} \cdot \frac{\pi_\gamma\{d(\mathbf{X}), \mathbf{X}; \gamma_0\}}{1 - \pi_0\{d(\mathbf{X}), \mathbf{X}\}} \right]^2,$$

$$B_2 = -2 \cdot \frac{1 - \pi_0\{d(\mathbf{X}), \mathbf{X}\}}{\pi_0\{d(\mathbf{X}), \mathbf{X}\}} Q_0\{\mathbf{X}, d(\mathbf{X})\} \left[ Q\{\mathbf{X}, d(\mathbf{X}); \boldsymbol{\beta}^*\} + \Gamma_0(\boldsymbol{\beta}^*) \Sigma_{\gamma\gamma,0}^{-1} \cdot \frac{\pi_\gamma\{d(\mathbf{X}), \mathbf{X}; \gamma_0\}}{1 - \pi_0\{d(\mathbf{X}), \mathbf{X}\}} \right].$$

Therefore, the first term  $E\{\text{Var}(\cdot | X)\}$  equals

$$\begin{aligned} & E \left( \frac{1 - \pi_0\{d(\mathbf{X}), \mathbf{X}\}}{\pi_0\{d(\mathbf{X}), \mathbf{X}\}} \left[ Q\{\mathbf{X}, d(\mathbf{X}); \boldsymbol{\beta}^*\} + \Gamma_0(\boldsymbol{\beta}^*) \Sigma_{\gamma\gamma,0}^{-1} \cdot \frac{\pi_\gamma\{d(\mathbf{X}), \mathbf{X}; \gamma_0\}}{1 - \pi_0\{d(\mathbf{X}), \mathbf{X}\}} \right]^2 \right) \\ & - 2E \left( \frac{1 - \pi_0\{d(\mathbf{X}), \mathbf{X}\}}{\pi_0\{d(\mathbf{X}), \mathbf{X}\}} Q_0\{\mathbf{X}, d(\mathbf{X})\} \left[ Q\{\mathbf{X}, d(\mathbf{X}); \boldsymbol{\beta}^*\} + \Gamma_0(\boldsymbol{\beta}^*) \Sigma_{\gamma\gamma,0}^{-1} \cdot \frac{\pi_\gamma\{d(\mathbf{X}), \mathbf{X}; \gamma_0\}}{1 - \pi_0\{d(\mathbf{X}), \mathbf{X}\}} \right] \right) \\ & + E \left( \left[ \frac{RY}{\pi_0\{d(\mathbf{X}), \mathbf{X}\}} - Q_0\{\mathbf{X}, d(\mathbf{X})\} \right]^2 \right). \end{aligned}$$

By taking the derivative with respect to  $\boldsymbol{\beta}^*$  and set it equal to 0, we know that the variance is minimized by the solution to the following equation.

$$\begin{aligned} & E \left( \frac{1 - \pi_0\{d(\mathbf{X}), \mathbf{X}\}}{\pi_0\{d(\mathbf{X}), \mathbf{X}\}} \left[ Q_\beta\{\mathbf{X}, d(\mathbf{X}); \boldsymbol{\beta}\} + \Phi_0(\boldsymbol{\beta}) \Sigma_{\gamma\gamma,0}^{-1} \cdot \frac{\pi_\gamma\{d(\mathbf{X}), \mathbf{X}; \gamma_0\}}{1 - \pi_0\{d(\mathbf{X}), \mathbf{X}\}} \right] \right. \\ & \cdot \left. \left[ Q_0\{\mathbf{X}, d(\mathbf{X})\} - Q\{\mathbf{X}, d(\mathbf{X}); \boldsymbol{\beta}\} - \Gamma_0(\boldsymbol{\beta}) \Sigma_{\gamma\gamma,0}^{-1} \cdot \frac{\pi_\gamma\{d(\mathbf{X}), \mathbf{X}; \gamma_0\}}{1 - \pi_0\{d(\mathbf{X}), \mathbf{X}\}} \right] \right) = 0. \end{aligned} \quad (\text{S.5})$$

In a slight abuse of notation, we use  $\boldsymbol{\beta}^{\text{opt}}$  to denote this minimizer.

## A.7 Improved DR property of $\widehat{V}(d; \hat{\gamma}, \hat{\boldsymbol{\beta}}^{\text{opt3}})$

When the model for propensity score is correctly specified, by observing that  $\hat{\gamma} \xrightarrow{p} \gamma_0$  and  $\widehat{\Sigma}_{\gamma\gamma}, \widehat{\Gamma}(\boldsymbol{\beta}), \widehat{\Phi}(\boldsymbol{\beta})$  converge to  $\Sigma_{\gamma\gamma,0}, \Gamma_0(\boldsymbol{\beta}), \Phi_0(\boldsymbol{\beta})$ , respectively, it is straightforward to show that the left-hand side of (9) converges in probability to the left-hand side of (S.5), thus  $\hat{\boldsymbol{\beta}}^{\text{opt3}} \xrightarrow{p} \boldsymbol{\beta}^{\text{opt}}$ . On the other hand, when the outcome model is correct but the propensity score is not,  $\hat{\gamma} \xrightarrow{p} \gamma^*$ , the left-hand side of (9) converges to

$$\begin{aligned} & E \left( \frac{\pi_0\{d(\mathbf{X}), \mathbf{X}\} [1 - \pi\{d(\mathbf{X}), \mathbf{X}; \gamma^*\}]}{\pi^2\{d(\mathbf{X}), \mathbf{X}; \gamma^*\}} \left[ Q_\beta\{\mathbf{X}, d(\mathbf{X}); \boldsymbol{\beta}\} + \Phi_*(\boldsymbol{\beta}) \Sigma_{\gamma\gamma,*}^{-1} \cdot \frac{\pi_\gamma\{d(\mathbf{X}), \mathbf{X}; \gamma^*\}}{1 - \pi\{d(\mathbf{X}), \mathbf{X}; \gamma^*\}} \right] \right. \\ & \cdot \left. \left[ Q_0\{\mathbf{X}, d(\mathbf{X})\} - Q\{\mathbf{X}, d(\mathbf{X}); \boldsymbol{\beta}\} - \Gamma_*(\boldsymbol{\beta}) \Sigma_{\gamma\gamma,*}^{-1} \cdot \frac{\pi_\gamma\{d(\mathbf{X}), \mathbf{X}; \gamma^*\}}{1 - \pi\{d(\mathbf{X}), \mathbf{X}; \gamma^*\}} \right] \right), \end{aligned} \quad (\text{S.6})$$

where  $\Sigma_{\gamma\gamma,*} = E \{S_\gamma(A, \mathbf{X}, \gamma^*)S_\gamma^\top(A, \mathbf{X}, \gamma^*)\}$ ,  $\Gamma_*(\boldsymbol{\beta}) = -E \{\partial\tilde{\varphi}(Y, A, \mathbf{X}, \gamma^*, \boldsymbol{\beta})/\partial\boldsymbol{\gamma}^\top\}$ ,  $\Phi_*(\boldsymbol{\beta}) = -E \{\partial^2\tilde{\varphi}(Y, A, \mathbf{X}, \gamma^*, \boldsymbol{\beta})/\partial\boldsymbol{\gamma}^\top\partial\boldsymbol{\beta}\}$ . By noting that  $\Gamma_*(\boldsymbol{\beta}_0) = 0$ , (S.6) equals 0 when  $\boldsymbol{\beta} = \boldsymbol{\beta}_0$ , thus,  $\hat{\boldsymbol{\beta}}^{\text{opt}3} \xrightarrow{p} \boldsymbol{\beta}_0$ . Hence,  $\hat{V}(d; \hat{\boldsymbol{\gamma}}, \hat{\boldsymbol{\beta}}^{\text{opt}3})$  is improved DR.

## Appendix B: Asymptotic normality of semiparametric M-estimators

Chen et al. (2003) established the asymptotic theory of semiparametric M-estimators when there is one infinite dimensional parameter. In this Section, we extend their results to the case where there are two infinite dimensional parameters.

Suppose that there exists a vector-valued function  $\mathbf{m}$  such that  $E \{\mathbf{m}(\mathbf{U}_i, \boldsymbol{\theta}, g_0(\cdot, \boldsymbol{\theta}), h_0(\cdot, \boldsymbol{\theta}))\} = \mathbf{0}$  at  $\boldsymbol{\theta} = \boldsymbol{\theta}_0$ . We denote  $\boldsymbol{\theta}_0 \in \Theta$  and  $g_0, h_0 \in \mathcal{H}$  as the true unknown finite and infinite dimensional parameters. Assume that  $g_0(\cdot, \boldsymbol{\theta})$  and  $h_0(\cdot, \boldsymbol{\theta})$  are functions of  $\mathbf{U}$ , possibly indexed by  $\boldsymbol{\theta}$ . We usually suppress the arguments of the functions  $g_0, h_0$  for notational convenience, i.e.,  $(\boldsymbol{\theta}, g, h) \equiv (\boldsymbol{\theta}, g(\cdot, \boldsymbol{\theta}), h(\cdot, \boldsymbol{\theta}))$ ,  $(\boldsymbol{\theta}, g_0, h_0) \equiv (\boldsymbol{\theta}, g_0(\cdot, \boldsymbol{\theta}), h_0(\cdot, \boldsymbol{\theta}))$ . We assume that  $\mathcal{H}$  is a vector space of functions endowed with a pseudo-metric  $\|\cdot\|_{\mathcal{H}}$ . For example, when  $\mathcal{H}$  is a class of continuous functions, we can take  $\|g\|_{\mathcal{H}} = \sup_{\boldsymbol{\theta}} \|g(\cdot, \boldsymbol{\theta})\|_{\infty} = \sup_{\boldsymbol{\theta}} \sup_{\mathbf{U}} |g(\mathbf{U}, \boldsymbol{\theta})|$ . Furthermore, let us define  $\mathbf{M}(\boldsymbol{\theta}, g, h) = E \{\mathbf{m}(\mathbf{U}_i, \boldsymbol{\theta}, g, h)\}$  and  $\mathbf{M}_n(\boldsymbol{\theta}, g, h) = n^{-1} \sum_{i=1}^n \mathbf{m}(\mathbf{U}_i, \boldsymbol{\theta}, g, h)$ .

Let us denote  $\Theta_\delta \equiv \{\boldsymbol{\theta} \in \Theta : \|\boldsymbol{\theta} - \boldsymbol{\theta}_0\| \leq \delta\}$ ,  $\mathcal{G}_\delta \equiv \{g \in \mathcal{H} : \|g - g_0\|_{\mathcal{H}} \leq \delta\}$  and  $\mathcal{H}_\delta \equiv \{h \in \mathcal{H} : \|h - h_0\|_{\mathcal{H}} \leq \delta\}$  for some  $\delta > 0$ . For any  $(\boldsymbol{\theta}, g, h) \in \Theta_\delta \times \mathcal{G}_\delta \times \mathcal{H}_\delta$ , we denote the ordinary derivative of  $\mathbf{M}(\boldsymbol{\theta}, g, h)$  with respect to  $\boldsymbol{\theta}$  as  $\Gamma_1(\boldsymbol{\theta}, g, h)$ , which satisfies

$$\begin{aligned} \Gamma_1(\boldsymbol{\theta}, g, h)(\bar{\boldsymbol{\theta}} - \boldsymbol{\theta}) &= \lim_{\tau \rightarrow 0} \left\{ \mathbf{M}(\boldsymbol{\theta} + \tau(\bar{\boldsymbol{\theta}} - \boldsymbol{\theta}), g(\cdot, \boldsymbol{\theta} + \tau(\bar{\boldsymbol{\theta}} - \boldsymbol{\theta})), h(\cdot, \boldsymbol{\theta} + \tau(\bar{\boldsymbol{\theta}} - \boldsymbol{\theta}))) \right. \\ &\quad \left. - \mathbf{M}(\boldsymbol{\theta}, g(\cdot, \boldsymbol{\theta}), h(\cdot, \boldsymbol{\theta})) \right\} / \tau \end{aligned}$$

for all  $\bar{\boldsymbol{\theta}} \in \Theta$ . In the following discussion, we assume that the dimension of  $\mathbf{M}(\boldsymbol{\theta}, g, h)$  is the same as the dimension of  $\boldsymbol{\theta}$ , hence  $\boldsymbol{\Gamma}_1(\boldsymbol{\theta}, g, h)$  is a square matrix.

As in Chen et al. (2003), we say that  $\mathbf{M}(\boldsymbol{\theta}, g, h)$  is pathwise differentiable at  $g \in \mathcal{G}_\delta$  in the direction  $[\bar{g} - g]$  if  $\{g + \tau(\bar{g} - g) : \tau \in [0, 1]\} \subset \mathcal{H}$  and

$$\lim_{\tau \rightarrow 0} \{\mathbf{M}(\boldsymbol{\theta}, g(\cdot, \boldsymbol{\theta}) + \tau(\bar{g}(\cdot, \boldsymbol{\theta}) - g(\cdot, \boldsymbol{\theta})), h(\cdot, \boldsymbol{\theta})) - \mathbf{M}(\boldsymbol{\theta}, g(\cdot, \boldsymbol{\theta}), h(\cdot, \boldsymbol{\theta}))\} / \tau$$

exists; we denote the limit  $\boldsymbol{\Gamma}_2(\boldsymbol{\theta}, g, h)[\bar{g} - g]$ . Similarly, if

$$\lim_{\tau \rightarrow 0} \{\mathbf{M}(\boldsymbol{\theta}, g(\cdot, \boldsymbol{\theta}), h(\cdot, \boldsymbol{\theta}) + \tau(\bar{h}(\cdot, \boldsymbol{\theta}) - h(\cdot, \boldsymbol{\theta}))) - \mathbf{M}(\boldsymbol{\theta}, g(\cdot, \boldsymbol{\theta}), h(\cdot, \boldsymbol{\theta}))\} / \tau$$

exists; we denote the limit  $\boldsymbol{\Gamma}_3(\boldsymbol{\theta}, g, h)[\bar{h} - h]$ . These functional derivatives capture the effect of the nonparametric estimation of  $g_0, h_0$  on the variability of  $\hat{\boldsymbol{\theta}}$ .

**Theorem S1.** *Suppose that  $\boldsymbol{\theta}_0$  satisfies  $\mathbf{M}(\boldsymbol{\theta}_0, g_0, h_0) = \mathbf{0}$ , that  $\hat{\boldsymbol{\theta}} - \boldsymbol{\theta}_0 = o_p(1)$ , and that*

$$(1.1) \quad \|\mathbf{M}_n(\hat{\boldsymbol{\theta}}, \hat{g}, \hat{h})\| = \inf_{\boldsymbol{\theta} \in \Theta_\delta} \|\mathbf{M}_n(\boldsymbol{\theta}, \hat{g}, \hat{h})\| + o_p(1/\sqrt{n}).$$

(1.2) (i) *The ordinary derivative  $\boldsymbol{\Gamma}_1(\boldsymbol{\theta}, g_0, h_0)$  exists for  $\boldsymbol{\theta} \in \Theta_\delta$ , and is continuous at  $\boldsymbol{\theta} = \boldsymbol{\theta}_0$ ; (ii) the matrix  $\boldsymbol{\Gamma}_1 \equiv \boldsymbol{\Gamma}_1(\boldsymbol{\theta}_0, g_0, h_0)$  is of full rank.*

(1.3) *For all  $\boldsymbol{\theta} \in \Theta_\delta$ , the pathwise derivatives  $\boldsymbol{\Gamma}_2(\boldsymbol{\theta}, g_0, h_0)[g - g_0]$  and  $\boldsymbol{\Gamma}_3(\boldsymbol{\theta}, g_0, h_0)[h - h_0]$  exist in all directions  $[g - g_0], [h - h_0] \in \mathcal{H}$ ; and for all  $(\boldsymbol{\theta}, g, h) \in \Theta_{\delta_n} \times \mathcal{G}_{\delta_n} \times \mathcal{H}_{\delta_n}$  with a positive sequence  $\delta_n = o(1)$ : (i)  $\|\mathbf{M}(\boldsymbol{\theta}, g, h) - \mathbf{M}(\boldsymbol{\theta}, g_0, h_0) - \boldsymbol{\Gamma}_2(\boldsymbol{\theta}, g_0, h_0)[g - g_0] - \boldsymbol{\Gamma}_3(\boldsymbol{\theta}, g_0, h_0)[h - h_0]\| \leq c\{\|g - g_0\|_{\mathcal{H}}^2 + \|h - h_0\|_{\mathcal{H}}^2\}$  for a constant  $c \geq 0$ ; (ii)  $\|\boldsymbol{\Gamma}_2(\boldsymbol{\theta}, g_0, h_0)[g - g_0] - \boldsymbol{\Gamma}_2(\boldsymbol{\theta}_0, g_0, h_0)[g - g_0]\| \leq o(1)\delta_n$ ; (iii)  $\|\boldsymbol{\Gamma}_3(\boldsymbol{\theta}, g_0, h_0)[h - h_0] - \boldsymbol{\Gamma}_3(\boldsymbol{\theta}_0, g_0, h_0)[h - h_0]\| \leq o(1)\delta_n$ .*

(1.4)  $\hat{g}, \hat{h} \in \mathcal{H}$  *with probability tending to one; and  $\|\hat{g} - g_0\|_{\mathcal{H}} = o_p(n^{-1/4})$ ,  $\|\hat{h} - h_0\|_{\mathcal{H}} = o_p(n^{-1/4})$ .*

(1.5) *For all sequences of positive numbers  $\{\delta_n\}$  with  $\delta_n = o(1)$ ,*

$$\sup_{(\boldsymbol{\theta}, g, h) \in \Theta_{\delta_n} \times \mathcal{G}_{\delta_n} \times \mathcal{H}_{\delta_n}} \frac{\sqrt{n} \|\mathbf{M}_n(\boldsymbol{\theta}, g, h) - \mathbf{M}(\boldsymbol{\theta}, g, h) - \mathbf{M}_n(\boldsymbol{\theta}_0, g_0, h_0)\|}{1 + \sqrt{n} \{\|\mathbf{M}_n(\boldsymbol{\theta}, g, h)\| + \|\mathbf{M}(\boldsymbol{\theta}, g, h)\|\}} = o_p(1).$$

(1.6) For some finite matrix  $\mathbf{V}_1$ ,

$$\sqrt{n} \left\{ \mathbf{M}_n(\boldsymbol{\theta}_0, g_0, h_0) + \boldsymbol{\Gamma}_2(\boldsymbol{\theta}_0, g_0, h_0)[\hat{g} - g_0] + \boldsymbol{\Gamma}_3(\boldsymbol{\theta}_0, g_0, h_0)[\hat{h} - h_0] \right\} \xrightarrow{D} N(\mathbf{0}, \mathbf{V}_1).$$

Then,  $\sqrt{n}(\hat{\boldsymbol{\theta}} - \boldsymbol{\theta}_0) \xrightarrow{D} N(\mathbf{0}, \boldsymbol{\Omega})$ , where  $\boldsymbol{\Omega} \equiv \boldsymbol{\Gamma}_1^{-1} \mathbf{V}_1 \{\boldsymbol{\Gamma}_1^{-1}\}^\top$ .

*Proof.* The proof is very similar to that of Theorem 2 in Chen et al. (2003) and Theorem 3.3 in Pakes and Pollard (1989).

We first establish  $\sqrt{n}$ -consistency of  $\hat{\boldsymbol{\theta}}$  to  $\boldsymbol{\theta}_0$ . We choose a positive sequence  $\delta_n = o(1)$  such that  $\Pr(\|\hat{\boldsymbol{\theta}} - \boldsymbol{\theta}_0\| \geq \delta_n, \|\hat{g} - g_0\|_{\mathcal{H}} \geq \delta_n, \|\hat{h} - h_0\|_{\mathcal{H}} \geq \delta_n) \rightarrow 0$ . By condition (1.2), there exists a constant  $C > 0$  such that  $\|\hat{\boldsymbol{\theta}} - \boldsymbol{\theta}_0\|C$  is bounded by  $\|\mathbf{M}(\hat{\boldsymbol{\theta}}, g_0, h_0)\|$  with probability tending to one; this in turn is bounded above by

$$\begin{aligned} & \|\mathbf{M}(\hat{\boldsymbol{\theta}}, g_0, h_0) - \mathbf{M}(\hat{\boldsymbol{\theta}}, \hat{g}, \hat{h})\| + \|\mathbf{M}(\hat{\boldsymbol{\theta}}, \hat{g}, \hat{h}) - \mathbf{M}_n(\hat{\boldsymbol{\theta}}, \hat{g}, \hat{h}) + \mathbf{M}_n(\boldsymbol{\theta}_0, g_0, h_0)\| \\ & + \|\mathbf{M}_n(\hat{\boldsymbol{\theta}}, \hat{g}, \hat{h})\| + O_p(n^{-1/2}) \end{aligned} \quad (\text{S.7})$$

by the triangle inequality and condition (1.6). By condition (1.3), (1.4) and (1.6),

$$\begin{aligned} & \|\mathbf{M}(\hat{\boldsymbol{\theta}}, g_0, h_0) - \mathbf{M}(\hat{\boldsymbol{\theta}}, \hat{g}, \hat{h})\| \\ \leq & \|\mathbf{M}(\hat{\boldsymbol{\theta}}, \hat{g}, \hat{h}) - \mathbf{M}(\hat{\boldsymbol{\theta}}, g_0, h_0) - \boldsymbol{\Gamma}_2(\hat{\boldsymbol{\theta}}, g_0, h_0)[\hat{g} - g_0] - \boldsymbol{\Gamma}_3(\hat{\boldsymbol{\theta}}, g_0, h_0)[\hat{h} - h_0]\| \\ & + \|\boldsymbol{\Gamma}_2(\hat{\boldsymbol{\theta}}, g_0, h_0)[\hat{g} - g_0] - \boldsymbol{\Gamma}_2(\boldsymbol{\theta}_0, g_0, h_0)[\hat{g} - g_0]\| + \|\boldsymbol{\Gamma}_2(\boldsymbol{\theta}_0, g_0, h_0)[\hat{g} - g_0]\| \\ & + \|\boldsymbol{\Gamma}_3(\hat{\boldsymbol{\theta}}, g_0, h_0)[\hat{h} - h_0] - \boldsymbol{\Gamma}_3(\boldsymbol{\theta}_0, g_0, h_0)[\hat{h} - h_0]\| + \|\boldsymbol{\Gamma}_3(\boldsymbol{\theta}_0, g_0, h_0)[\hat{h} - h_0]\| \\ \leq & c \left\{ \|\hat{g} - g_0\|_{\mathcal{H}}^2 + \|\hat{h} - h_0\|_{\mathcal{H}}^2 \right\} + \|\hat{\boldsymbol{\theta}} - \boldsymbol{\theta}_0\| \times o_p(1) + O_p(n^{-1/2}) \\ = & o_p(n^{-1/2}) + \|\hat{\boldsymbol{\theta}} - \boldsymbol{\theta}_0\| \times o_p(1) + O_p(n^{-1/2}) \\ \leq & \|\mathbf{M}(\hat{\boldsymbol{\theta}}, g_0, h_0)\| \times o_p(1) + O_p(n^{-1/2}). \end{aligned} \quad (\text{S.8})$$

Using the above fact and by condition (1.5),

$$\begin{aligned}
& \|\mathbf{M}(\hat{\boldsymbol{\theta}}, \hat{g}, \hat{h}) - \mathbf{M}_n(\hat{\boldsymbol{\theta}}, \hat{g}, \hat{h}) + \mathbf{M}_n(\boldsymbol{\theta}_0, g_0, h_0)\| \\
& \leq o_p(1) \times \left\{ n^{-1/2} + \|\mathbf{M}_n(\hat{\boldsymbol{\theta}}, \hat{g}, \hat{h})\| + \|\mathbf{M}(\hat{\boldsymbol{\theta}}, \hat{g}, \hat{h})\| \right\} \\
& \leq o_p(1) \times \left\{ n^{-1/2} + \|\mathbf{M}_n(\hat{\boldsymbol{\theta}}, \hat{g}, \hat{h})\| + \|\mathbf{M}(\hat{\boldsymbol{\theta}}, g_0, h_0)\| + \|\mathbf{M}(\hat{\boldsymbol{\theta}}, g_0, h_0)\| \times o_p(1) + O_p(n^{-1/2}) \right\} \\
& = o_p(n^{-1/2}) + o_p(1) \times \left\{ \|\mathbf{M}_n(\hat{\boldsymbol{\theta}}, \hat{g}, \hat{h})\| + \|\mathbf{M}(\hat{\boldsymbol{\theta}}, g_0, h_0)\| \times (1 + o_p(1)) \right\}. \tag{S.9}
\end{aligned}$$

Combine (S.7), (S.8), (S.9) and condition (1.1), it implies that

$$\begin{aligned}
\|\mathbf{M}(\hat{\boldsymbol{\theta}}, g_0, h_0)\| \times \{1 - o_p(1)\} & \leq o_p(n^{-1/2}) + \|\mathbf{M}_n(\hat{\boldsymbol{\theta}}, \hat{g}, \hat{h})\| \times \{1 + o_p(1)\} + O_p(n^{-1/2}) \\
& \leq \inf_{\boldsymbol{\theta} \in \Theta_\delta} \|\mathbf{M}_n(\boldsymbol{\theta}, \hat{g}, \hat{h})\| \times \{1 + o_p(1)\} + O_p(n^{-1/2}). \tag{S.10}
\end{aligned}$$

By assuming that  $\mathbf{M}(\boldsymbol{\theta}, g, h)$  is continuous in  $g$  and  $h$  at  $g = g_0$ ,  $h = h_0$ , we have

$\|\mathbf{M}(\boldsymbol{\theta}, \hat{g}, \hat{h}) - \mathbf{M}(\boldsymbol{\theta}, g_0, h_0)\| = o_p(1)$ . Again under conditions (1.3)-(1.6), we have that

$$\begin{aligned}
\|\mathbf{M}_n(\boldsymbol{\theta}, \hat{g}, \hat{h})\| & \leq \|\mathbf{M}_n(\boldsymbol{\theta}, \hat{g}, \hat{h}) - \mathbf{M}(\boldsymbol{\theta}, \hat{g}, \hat{h}) - \mathbf{M}_n(\boldsymbol{\theta}_0, g_0, h_0)\| + \|\mathbf{M}(\boldsymbol{\theta}, \hat{g}, \hat{h}) - \mathbf{M}(\boldsymbol{\theta}, g_0, h_0)\| \\
& \quad + \|\mathbf{M}(\boldsymbol{\theta}, g_0, h_0)\| + \|\mathbf{M}_n(\boldsymbol{\theta}_0, g_0, h_0)\| \\
& \leq o_p(n^{-1/2}) + o_p(1) \times \left\{ \|\mathbf{M}_n(\boldsymbol{\theta}, \hat{g}, \hat{h})\| + \|\mathbf{M}(\boldsymbol{\theta}, g_0, h_0)\| \times (1 + o_p(1)) \right\} \\
& \quad + \|\mathbf{M}(\boldsymbol{\theta}, g_0, h_0)\| + O_p(n^{-1/2}).
\end{aligned}$$

With  $\mathbf{M}(\boldsymbol{\theta}_0, g_0, h_0) = \mathbf{0}$ , we have  $\|\mathbf{M}_n(\boldsymbol{\theta}, \hat{g}, \hat{h})\| \times \{1 - o_p(1)\} \leq o_p(1) \times \|\mathbf{M}(\boldsymbol{\theta}, g_0, h_0) - \mathbf{M}(\boldsymbol{\theta}_0, g_0, h_0)\| + O_p(n^{-1/2})$  where all the  $o_p(1), O_p(n^{-1/2})$  holds uniformly with respect to  $\boldsymbol{\theta} \in \Theta_\delta$ .

$$\begin{aligned}
\inf_{\boldsymbol{\theta} \in \Theta_\delta} \|\mathbf{M}_n(\boldsymbol{\theta}, \hat{g}, \hat{h})\| & \leq o_p(1) \times \inf_{\boldsymbol{\theta} \in \Theta_\delta} \|\mathbf{M}(\boldsymbol{\theta}, g_0, h_0) - \mathbf{M}(\boldsymbol{\theta}_0, g_0, h_0)\| + O_p(n^{-1/2}) \\
& = O_p(n^{-1/2}).
\end{aligned}$$

This and (S.10) imply that  $\|\mathbf{M}(\hat{\boldsymbol{\theta}}, g_0, h_0)\| \leq O_p(n^{-1/2})$ . Hence,  $\|\hat{\boldsymbol{\theta}} - \boldsymbol{\theta}_0\|_C \leq \|\mathbf{M}(\hat{\boldsymbol{\theta}}, g_0, h_0)\| \leq O_p(n^{-1/2})$ .



Next we establish the asymptotic normality property. We only sketch the main steps here. Define the linearization  $\mathcal{L}_n(\boldsymbol{\theta}) = \mathbf{M}_n(\boldsymbol{\theta}_0, g_0, h_0) + \boldsymbol{\Gamma}_1(\boldsymbol{\theta} - \boldsymbol{\theta}_0) + \boldsymbol{\Gamma}_2(\boldsymbol{\theta}_0, g_0, h_0)[\hat{g} - g_0] + \boldsymbol{\Gamma}_3(\boldsymbol{\theta}_0, g_0, h_0)[\hat{h} - h_0]$ . By conditions (1.2)-(1.5) and the root- $n$  rate results above,

$$\begin{aligned}
& \|\mathbf{M}_n(\hat{\boldsymbol{\theta}}, \hat{g}, \hat{h}) - \mathcal{L}_n(\hat{\boldsymbol{\theta}})\| \\
&= \|\mathbf{M}(\hat{\boldsymbol{\theta}}, \hat{g}, \hat{h}) - \mathbf{M}(\hat{\boldsymbol{\theta}}, g_0, h_0) + \mathbf{M}_n(\hat{\boldsymbol{\theta}}, \hat{g}, \hat{h}) - \mathbf{M}(\hat{\boldsymbol{\theta}}, \hat{g}, \hat{h}) + \mathbf{M}(\hat{\boldsymbol{\theta}}, g_0, h_0) - \mathcal{L}_n(\hat{\boldsymbol{\theta}})\| \\
&\leq \|\mathbf{M}(\hat{\boldsymbol{\theta}}, \hat{g}, \hat{h}) - \mathbf{M}(\hat{\boldsymbol{\theta}}, g_0, h_0) - \boldsymbol{\Gamma}_2(\boldsymbol{\theta}_0, g_0, h_0)[\hat{g} - g_0] - \boldsymbol{\Gamma}_3(\boldsymbol{\theta}_0, g_0, h_0)[\hat{h} - h_0]\| \\
&\quad + \|\mathbf{M}(\hat{\boldsymbol{\theta}}, g_0, h_0) - \boldsymbol{\Gamma}_1(\hat{\boldsymbol{\theta}} - \boldsymbol{\theta}_0)\| + \|\mathbf{M}_n(\hat{\boldsymbol{\theta}}, \hat{g}, \hat{h}) - \mathbf{M}(\hat{\boldsymbol{\theta}}, \hat{g}, \hat{h}) - \mathbf{M}_n(\boldsymbol{\theta}_0, g_0, h_0)\| \\
&= o_p(n^{-1/2}).
\end{aligned}$$

Let us define  $\bar{\boldsymbol{\theta}}$  as the minimizer of  $\|\mathcal{L}_n(\cdot)\|$ , it is straightforward to show that  $\bar{\boldsymbol{\theta}}$  satisfies

$$\sqrt{n}(\bar{\boldsymbol{\theta}} - \boldsymbol{\theta}_0) = -\boldsymbol{\Gamma}_1^{-1}\sqrt{n}\left\{\mathbf{M}_n(\boldsymbol{\theta}_0, g_0, h_0) + \boldsymbol{\Gamma}_2(\boldsymbol{\theta}_0, g_0, h_0)[\hat{g} - g_0] + \boldsymbol{\Gamma}_3(\boldsymbol{\theta}_0, g_0, h_0)[\hat{h} - h_0]\right\}.$$

Similarly,  $\|\mathbf{M}_n(\bar{\boldsymbol{\theta}}, \hat{g}, \hat{h}) - \mathcal{L}_n(\bar{\boldsymbol{\theta}})\| = o_p(n^{-1/2})$ . A little more work shows that  $\sqrt{n}(\hat{\boldsymbol{\theta}} - \bar{\boldsymbol{\theta}}) = o_p(1)$ . Hence,  $\sqrt{n}(\hat{\boldsymbol{\theta}} - \boldsymbol{\theta}_0) \xrightarrow{D} N(\mathbf{0}, \boldsymbol{\Omega})$ , where  $\boldsymbol{\Omega} \equiv \boldsymbol{\Gamma}_1^{-1}\mathbf{V}_1\{\boldsymbol{\Gamma}_1^{-1}\}^\top$ .  $\square$

## Appendix C: Details and proof of Theorem 1

Let us write  $\mathbf{U} = (Y, A, \mathbf{X})$  and let  $\boldsymbol{\theta}$  be the collection of unknown parameters involved in obtaining the estimators for  $V(d)$ . For  $\hat{V}(d; \hat{\boldsymbol{\beta}}^{\text{LS}})$  and  $\hat{V}(d; \hat{\boldsymbol{\beta}}^{\text{opt1}})$ , the estimator for  $\boldsymbol{\theta}$ ,  $\hat{\boldsymbol{\theta}}$ , can be obtained by solving a set of M-estimating equations  $\sum_{i=1}^n \mathbf{m}(\mathbf{U}_i, \boldsymbol{\theta}) = \mathbf{0}$  (Stefanski and Boos, 2002), where the last element of  $\mathbf{m}(\mathbf{U}_i, \boldsymbol{\theta})$  corresponds to the estimating equation for  $V(d)$ . We denote  $\boldsymbol{\theta}_0$  as the value that satisfies  $E\{\mathbf{m}(\mathbf{U}_i, \boldsymbol{\theta}_0)\} = \mathbf{0}$ . Following standard M-estimation theory,  $\sqrt{n}(\hat{\boldsymbol{\theta}} - \boldsymbol{\theta}_0) \xrightarrow{D} N(\mathbf{0}, \mathbf{B}(\boldsymbol{\theta}_0)^{-1}\mathbf{C}(\boldsymbol{\theta}_0)\{\mathbf{B}(\boldsymbol{\theta}_0)^{-1}\}^\top)$ , where  $\mathbf{B}(\boldsymbol{\theta}) = E\{\partial\mathbf{m}(\mathbf{U}_i, \boldsymbol{\theta})/\partial\boldsymbol{\theta}^\top\}$  and  $\mathbf{C}(\boldsymbol{\theta}) = E\{\mathbf{m}(\mathbf{U}_i, \boldsymbol{\theta})\mathbf{m}^\top(\mathbf{U}_i, \boldsymbol{\theta})\}$ . Therefore, the asymptotic variance of  $\hat{V}(d; \hat{\boldsymbol{\beta}}^{\text{LS}})$  and  $\hat{V}(d; \hat{\boldsymbol{\beta}}^{\text{opt1}})$  is in the last, rightmost diagonal entry

of the corresponding matrix  $\mathbf{B}(\boldsymbol{\theta}_0)^{-1}\mathbf{C}(\boldsymbol{\theta}_0)\{\mathbf{B}(\boldsymbol{\theta}_0)^{-1}\}^\top$ . For  $\widehat{V}(d; \widehat{\boldsymbol{\beta}}^{\text{opt2}})$ , the estimator for  $\boldsymbol{\theta}$ ,  $\widehat{\boldsymbol{\theta}}$ , can be obtained by solving  $\sum_{i=1}^n \mathbf{m}(\mathbf{U}_i, \boldsymbol{\theta}, \widehat{g}, \widehat{h}) = \mathbf{0}$  where  $\widehat{g}, \widehat{h}$  are nonparametric estimators of some infinite dimensional parameters. In this case, the infinite dimensional parameters are the conditional expectations of  $Y$  given  $(\mathbf{X}, A)$ . We utilize semiparametric M-estimation theory to calculate the asymptotic variance of  $\widehat{\boldsymbol{\theta}}$ .

In the following discussions, we assume that  $\boldsymbol{\gamma}$  is a  $q$ -dimensional vector, i.e.,  $\boldsymbol{\gamma} = (\gamma_1, \dots, \gamma_q)$  and  $\boldsymbol{\beta}$  is a  $s$ -dimensional vector, i.e.,  $\boldsymbol{\beta} = (\beta_1, \dots, \beta_s)$ . We use  $\mathbf{0}_{a \times b}$  to denote a zero matrix with  $a$  rows and  $b$  columns. Sometimes we omit the dimension when there is no confusion. In addition, let us define  $Q_{\boldsymbol{\beta}\boldsymbol{\beta}}(\mathbf{X}, A; \boldsymbol{\beta}) = \partial^2 Q(\mathbf{X}, A; \boldsymbol{\beta}) / \partial \boldsymbol{\beta} \partial \boldsymbol{\beta}^\top$ , and let  $g_0(\mathbf{X}) \triangleq E(Y \mid \mathbf{X}, A = 1)$ ,  $h_0(\mathbf{X}) \triangleq E(Y \mid \mathbf{X}, A = -1)$  denote the true infinite dimensional parameters.

**Theorem 1.** (*Asymptotic normality when propensity score model is fully specified*). *The unknown parameters are  $\boldsymbol{\theta} = (\boldsymbol{\beta}^\top, V(d))^\top$ . When either the propensity score or the outcome model is correct,*

$$\sqrt{n} \left\{ \widehat{V}(d; \widehat{\boldsymbol{\beta}}^{LS}) - V(d) \right\} \xrightarrow{D} N(0, U_1(\boldsymbol{\theta}^{LS})),$$

where  $U_1(\boldsymbol{\theta}) = \mathbf{B}_2(\boldsymbol{\theta})\{\mathbf{B}_1^{LS}(\boldsymbol{\theta})\}^{-1}\mathbf{C}_{11}^{LS}(\boldsymbol{\theta})\{\mathbf{B}_1^{LS}(\boldsymbol{\theta})\}^{-1}\mathbf{B}_2^\top(\boldsymbol{\theta}) - 2\mathbf{B}_2(\boldsymbol{\theta})\{\mathbf{B}_1^{LS}(\boldsymbol{\theta})\}^{-1}\mathbf{C}_{12}^{LS}(\boldsymbol{\theta}) + \mathbf{C}_{22}(\boldsymbol{\theta})$ . Here,

$$\begin{aligned} \mathbf{B}_1^{LS}(\boldsymbol{\theta}) &= E \left[ Q_{\boldsymbol{\beta}\boldsymbol{\beta}}(\mathbf{X}, A; \boldsymbol{\beta}) \{Y - Q(\mathbf{X}, A; \boldsymbol{\beta})\} - Q_{\boldsymbol{\beta}}(\mathbf{X}, A; \boldsymbol{\beta}) Q_{\boldsymbol{\beta}}^\top(\mathbf{X}, A; \boldsymbol{\beta}) \right], \\ \mathbf{B}_2(\boldsymbol{\theta}) &= E \left[ \left( 1 - \frac{I\{A = d(\mathbf{X})\}}{\pi\{d(\mathbf{X}), \mathbf{X}\}} \right) Q_{\boldsymbol{\beta}}^\top\{\mathbf{X}, d(\mathbf{X}); \boldsymbol{\beta}\} \right], \\ \mathbf{C}_{11}^{LS}(\boldsymbol{\theta}) &= E \left[ \{Y - Q(\mathbf{X}, A; \boldsymbol{\beta})\}^2 Q_{\boldsymbol{\beta}}(\mathbf{X}, A; \boldsymbol{\beta}) Q_{\boldsymbol{\beta}}^\top(\mathbf{X}, A; \boldsymbol{\beta}) \right], \\ \mathbf{C}_{12}^{LS}(\boldsymbol{\theta}) &= E \left( \frac{I\{A = d(\mathbf{X})\}}{\pi\{d(\mathbf{X}), \mathbf{X}\}} \{Y - Q(\mathbf{X}, A; \boldsymbol{\beta})\}^2 Q_{\boldsymbol{\beta}}(\mathbf{X}, A; \boldsymbol{\beta}) \right. \\ &\quad \left. + \{Y - Q(\mathbf{X}, A; \boldsymbol{\beta})\} [Q\{\mathbf{X}, d(\mathbf{X}); \boldsymbol{\beta}\} - V(d)] Q_{\boldsymbol{\beta}}(\mathbf{X}, A; \boldsymbol{\beta}) \right), \\ \mathbf{C}_{22}(\boldsymbol{\theta}) &= E \left( \frac{I\{A = d(\mathbf{X})\}}{\pi\{d(\mathbf{X}), \mathbf{X}\}} [Y - Q\{\mathbf{X}, d(\mathbf{X}); \boldsymbol{\beta}\}] + Q\{\mathbf{X}, d(\mathbf{X}); \boldsymbol{\beta}\} - V(d) \right)^2. \end{aligned}$$

The true values are  $\boldsymbol{\theta}_0^{LS} = (\boldsymbol{\beta}_{LS}^{*\top}, V(d))^\top$  where  $\boldsymbol{\beta}_{LS}^*$  satisfies  $E [Q_{\boldsymbol{\beta}}(\mathbf{X}, A; \boldsymbol{\beta}_{LS}^*) \{Y - Q(\mathbf{X}, A; \boldsymbol{\beta}_{LS}^*)\}] = \mathbf{0}$ . For the improved DR estimator with IPW estimating equation,

$$\sqrt{n} \left\{ \widehat{V}(d; \hat{\boldsymbol{\beta}}^{opt1}) - V(d) \right\} \xrightarrow{D} N(0, U_2(\boldsymbol{\theta}_0^{opt1})),$$

where  $U_2(\boldsymbol{\theta}) = \mathbf{B}_2(\boldsymbol{\theta})\{\mathbf{B}_1^{opt1}(\boldsymbol{\theta})\}^{-1}\mathbf{C}_{11}^{opt1}(\boldsymbol{\theta})\{\mathbf{B}_1^{opt1}(\boldsymbol{\theta})\}^{-1}\mathbf{B}_2^\top(\boldsymbol{\theta}) - 2\mathbf{B}_2(\boldsymbol{\theta})\{\mathbf{B}_1^{opt1}(\boldsymbol{\theta})\}^{-1}\mathbf{C}_{12}^{opt1}(\boldsymbol{\theta}) + \mathbf{C}_{22}(\boldsymbol{\theta})$ . Here,

$$\begin{aligned} \mathbf{B}_1^{opt1}(\boldsymbol{\theta}) &= E \left\{ \frac{I\{A = d(\mathbf{X})\}}{\pi\{d(\mathbf{X}), \mathbf{X}\}} \cdot \frac{1 - \pi\{d(\mathbf{X}), \mathbf{X}\}}{\pi\{d(\mathbf{X}), \mathbf{X}\}} \right. \\ &\quad \cdot \left. \left( \left[ Y - Q\{\mathbf{X}, d(\mathbf{X}); \boldsymbol{\beta}\} \right] Q_{\boldsymbol{\beta}\boldsymbol{\beta}}\{\mathbf{X}, d(\mathbf{X}); \boldsymbol{\beta}\} - Q_{\boldsymbol{\beta}}\{\mathbf{X}, d(\mathbf{X}); \boldsymbol{\beta}\} Q_{\boldsymbol{\beta}}^\top\{\mathbf{X}, d(\mathbf{X}); \boldsymbol{\beta}\} \right) \right\}, \\ \mathbf{C}_{11}^{opt1}(\boldsymbol{\theta}) &= E \left( \frac{I\{A = d(\mathbf{X})\} [1 - \pi\{d(\mathbf{X}), \mathbf{X}\}]^2}{\pi^4\{d(\mathbf{X}), \mathbf{X}\}} \left[ Y - Q\{\mathbf{X}, d(\mathbf{X}); \boldsymbol{\beta}\} \right]^2 \right. \\ &\quad \cdot \left. Q_{\boldsymbol{\beta}}\{\mathbf{X}, d(\mathbf{X}); \boldsymbol{\beta}\} Q_{\boldsymbol{\beta}}^\top\{\mathbf{X}, d(\mathbf{X}); \boldsymbol{\beta}\} \right), \\ \mathbf{C}_{12}^{opt1}(\boldsymbol{\theta}) &= E \left( \frac{I\{A = d(\mathbf{X})\} [1 - \pi\{d(\mathbf{X}), \mathbf{X}\}]}{\pi^2\{d(\mathbf{X}), \mathbf{X}\}} \left[ Y - Q\{\mathbf{X}, d(\mathbf{X}); \boldsymbol{\beta}\} \right] Q_{\boldsymbol{\beta}}\{\mathbf{X}, d(\mathbf{X}); \boldsymbol{\beta}\} \right. \\ &\quad \cdot \left. \left[ \frac{Y - Q\{\mathbf{X}, d(\mathbf{X}); \boldsymbol{\beta}\}}{\pi\{d(\mathbf{X}), \mathbf{X}\}} + Q\{\mathbf{X}, d(\mathbf{X}); \boldsymbol{\beta}\} - V(d) \right] \right). \end{aligned}$$

The true values are  $\boldsymbol{\theta}_0^{opt1} = (\boldsymbol{\beta}_{opt1}^{*\top}, V(d))^\top$  where  $\boldsymbol{\beta}_{opt1}^*$  satisfies

$$E \left( \frac{I\{A = d(\mathbf{X})\}}{\pi\{d(\mathbf{X}), \mathbf{X}\}} \cdot \frac{1 - \pi\{d(\mathbf{X}), \mathbf{X}\}}{\pi\{d(\mathbf{X}), \mathbf{X}\}} \left[ Y - Q\{\mathbf{X}, d(\mathbf{X}); \boldsymbol{\beta}_{opt1}^*\} \right] Q_{\boldsymbol{\beta}}\{\mathbf{X}, d(\mathbf{X}); \boldsymbol{\beta}_{opt1}^*\} \right) = \mathbf{0}.$$

For the improved DR estimator with augmented IPW estimating equation,

$$\sqrt{n} \left\{ \widehat{V}(d; \hat{\boldsymbol{\beta}}^{opt2}) - V(d) \right\} \xrightarrow{D} N(0, U_3(\boldsymbol{\theta}_0^{opt2})),$$

where  $U_3(\boldsymbol{\theta}) = \mathbf{B}_2(\boldsymbol{\theta})\{\mathbf{B}_1^{opt2}(\boldsymbol{\theta})\}^{-1}\mathbf{C}_{11}^{opt2}(\boldsymbol{\theta})\{\mathbf{B}_1^{opt2}(\boldsymbol{\theta})\}^{-1}\mathbf{B}_2^\top(\boldsymbol{\theta}) - 2\mathbf{B}_2(\boldsymbol{\theta})\{\mathbf{B}_1^{opt2}(\boldsymbol{\theta})\}^{-1}\mathbf{C}_{12}^{opt2}(\boldsymbol{\theta}) + \mathbf{C}_{22}(\boldsymbol{\theta})$ . Here,

$$\mathbf{B}_1^{opt2}(\boldsymbol{\theta}) = E \left\{ \partial \mathbf{m}_1 / \partial \boldsymbol{\beta}^\top \right\}, \quad \mathbf{C}_{11}^{opt2}(\boldsymbol{\theta}) = E \left\{ (\mathbf{m}_1 + \mathbf{q}_1 + \mathbf{q}_2)(\mathbf{m}_1 + \mathbf{q}_1 + \mathbf{q}_2)^\top \right\},$$

$$\mathbf{C}_{12}^{opt2}(\boldsymbol{\theta}) = E\{(\mathbf{m}_1 + \mathbf{q}_1 + \mathbf{q}_2)m_2\}.$$

Here we suppress the notations by writing  $\mathbf{m}_1 \equiv \mathbf{m}_1(\mathbf{U}_i, \boldsymbol{\theta}, g_0, h_0)$ ,  $m_2 \equiv m_2(\mathbf{U}_i, \boldsymbol{\theta})$ ,  $\mathbf{q}_1 \equiv \mathbf{q}_1(\mathbf{U}_i, \boldsymbol{\theta}, g_0, h_0)$ ,  $\mathbf{q}_2 \equiv \mathbf{q}_2(\mathbf{U}_i, \boldsymbol{\theta}, g_0, h_0)$  where

$$\begin{aligned} \mathbf{m}_1(\mathbf{U}, \boldsymbol{\theta}, g_0, h_0) &= \frac{I\{A = d(\mathbf{X})\}}{\pi\{d(\mathbf{X}), \mathbf{X}\}} \cdot \frac{1 - \pi\{d(\mathbf{X}), \mathbf{X}\}}{\pi\{d(\mathbf{X}), \mathbf{X}\}} \left[ Y - Q\{\mathbf{X}, d(\mathbf{X}); \boldsymbol{\beta}\} \right] Q_{\boldsymbol{\beta}}\{\mathbf{X}, d(\mathbf{X}); \boldsymbol{\beta}\} \\ &\quad - \left( \frac{I\{A = d(\mathbf{X})\} - \pi\{d(\mathbf{X}), \mathbf{X}\}}{\pi\{d(\mathbf{X}), \mathbf{X}\}} \cdot \frac{1 - \pi\{d(\mathbf{X}), \mathbf{X}\}}{\pi\{d(\mathbf{X}), \mathbf{X}\}} \right. \\ &\quad \left. \left[ g_0(\mathbf{X})I\{d(\mathbf{X}) = 1\} + h_0(\mathbf{X})I\{d(\mathbf{X}) = -1\} - Q\{\mathbf{X}, d(\mathbf{X}); \boldsymbol{\beta}\} \right] Q_{\boldsymbol{\beta}}\{\mathbf{X}, d(\mathbf{X}); \boldsymbol{\beta}\} \right), \\ m_2(\mathbf{U}, \boldsymbol{\theta}) &= \frac{I\{A = d(\mathbf{X})\}}{\pi\{d(\mathbf{X}), \mathbf{X}\}} [Y - Q\{\mathbf{X}, d(\mathbf{X}); \boldsymbol{\beta}\}] + Q\{\mathbf{X}, d(\mathbf{X}); \boldsymbol{\beta}\} - V(d), \\ \mathbf{q}_1(\mathbf{U}_i, \boldsymbol{\theta}, g_0, h_0) &= -\{Y_i - g_0(\mathbf{X}_i)\} \frac{I(A_i = 1)f_{\mathbf{X}}(\mathbf{X}_i)}{f_{\mathbf{X},A}(\mathbf{X}_i, 1)} \cdot \frac{\pi_0\{d(\mathbf{X}_i), \mathbf{X}_i\} - \pi\{d(\mathbf{X}_i), \mathbf{X}_i\}}{\pi\{d(\mathbf{X}_i), \mathbf{X}_i\}} \\ &\quad \frac{1 - \pi\{d(\mathbf{X}_i), \mathbf{X}_i\}}{\pi\{d(\mathbf{X}_i), \mathbf{X}_i\}} I\{d(\mathbf{X}_i) = 1\} Q_{\boldsymbol{\beta}}\{\mathbf{X}_i, d(\mathbf{X}_i); \boldsymbol{\beta}\}, \\ \mathbf{q}_2(\mathbf{U}_i, \boldsymbol{\theta}, g_0, h_0) &= -\{Y_i - h_0(\mathbf{X}_i)\} \frac{I(A_i = -1)f_{\mathbf{X}}(\mathbf{X}_i)}{f_{\mathbf{X},A}(\mathbf{X}_i, -1)} \cdot \frac{\pi_0\{d(\mathbf{X}_i), \mathbf{X}_i\} - \pi\{d(\mathbf{X}_i), \mathbf{X}_i\}}{\pi\{d(\mathbf{X}_i), \mathbf{X}_i\}} \\ &\quad \frac{1 - \pi\{d(\mathbf{X}_i), \mathbf{X}_i\}}{\pi\{d(\mathbf{X}_i), \mathbf{X}_i\}} I\{d(\mathbf{X}_i) = -1\} Q_{\boldsymbol{\beta}}\{\mathbf{X}_i, d(\mathbf{X}_i); \boldsymbol{\beta}\}, \end{aligned}$$

where  $f_{\mathbf{X},A}(\cdot, \cdot)$  and  $f_{\mathbf{X}}(\cdot)$  denote the density of  $(\mathbf{X}, A)$  and  $\mathbf{X}$ , respectively. The true values are  $\boldsymbol{\theta}_0^{opt2} = (\boldsymbol{\beta}_{opt2}^{*\top}, V(d))^\top$  where  $\boldsymbol{\beta}_{opt2}^*$  satisfies

$$\begin{aligned} &E \left( \frac{I\{A = d(\mathbf{X})\}}{\pi\{d(\mathbf{X}), \mathbf{X}\}} \cdot \frac{1 - \pi\{d(\mathbf{X}), \mathbf{X}\}}{\pi\{d(\mathbf{X}), \mathbf{X}\}} \left[ Y - Q\{\mathbf{X}, d(\mathbf{X}); \boldsymbol{\beta}_{opt2}^*\} \right] Q_{\boldsymbol{\beta}}\{\mathbf{X}, d(\mathbf{X}); \boldsymbol{\beta}_{opt2}^*\} \right) \\ &- E \left( \frac{I\{A = d(\mathbf{X})\} - \pi\{d(\mathbf{X}), \mathbf{X}\}}{\pi\{d(\mathbf{X}), \mathbf{X}\}} \cdot \frac{1 - \pi\{d(\mathbf{X}), \mathbf{X}\}}{\pi\{d(\mathbf{X}), \mathbf{X}\}} \right. \\ &\quad \left. \left[ Q_0\{\mathbf{X}, d(\mathbf{X})\} - Q\{\mathbf{X}, d(\mathbf{X}); \boldsymbol{\beta}_{opt2}^*\} \right] Q_{\boldsymbol{\beta}}\{\mathbf{X}, d(\mathbf{X}); \boldsymbol{\beta}_{opt2}^*\} \right) = \mathbf{0}. \end{aligned}$$

Consistent estimators of  $U_1, U_2, U_3$  can be constructed by replacing the expectation  $E$  with the empirical measure  $\mathbb{P}_n$  in the above quantities.

**Remark 1.** When the propensity score is correctly specified,  $\pi(A, \mathbf{X}) = \pi_0(A, \mathbf{X})$ , note that  $\mathbf{B}_2(\boldsymbol{\theta}) = \mathbf{0}$ , hence  $U_1(\boldsymbol{\theta}) = U_2(\boldsymbol{\theta}) = U_3(\boldsymbol{\theta}) = \mathbf{C}_{22}(\boldsymbol{\theta})$ , which is equal to

$$\begin{aligned} & E \left( \frac{I\{A = d(\mathbf{X})\}}{\pi_0\{d(\mathbf{X}), \mathbf{X}\}} [Y - Q\{\mathbf{X}, d(\mathbf{X}); \boldsymbol{\beta}\}] + Q\{\mathbf{X}, d(\mathbf{X}); \boldsymbol{\beta}\} - V(d) \right)^2 \\ &= E \left[ \frac{1 - \pi_0\{d(\mathbf{X}), \mathbf{X}\}}{\pi_0\{d(\mathbf{X}), \mathbf{X}\}} Q^2\{\mathbf{X}, d(\mathbf{X}); \boldsymbol{\beta}\} \right] + E \left[ \frac{Y I\{A = d(\mathbf{X})\}}{\pi_0\{d(\mathbf{X}), \mathbf{X}\}} - Q_0\{\mathbf{X}, d(\mathbf{X})\} \right]^2 \\ &\quad - 2E \left[ \frac{1 - \pi_0\{d(\mathbf{X}), \mathbf{X}\}}{\pi_0\{d(\mathbf{X}), \mathbf{X}\}} Q_0\{\mathbf{X}, d(\mathbf{X})\} \cdot Q\{\mathbf{X}, d(\mathbf{X}); \boldsymbol{\beta}\} \right] + \text{Var}[Q_0\{\mathbf{X}, d(\mathbf{X})\}]. \end{aligned}$$

Furthermore, note that  $\boldsymbol{\beta}_{opt1}^* = \boldsymbol{\beta}_{opt2}^* = \boldsymbol{\beta}^{opt}$  which minimizes the above quantity. This confirms that when the propensity score is correct but outcome model incorrect,  $\widehat{V}(d; \hat{\boldsymbol{\beta}}^{opt1})$  and  $\widehat{V}(d; \hat{\boldsymbol{\beta}}^{opt2})$  have the same asymptotic variance, which is smaller than that of  $\widehat{V}(d; \hat{\boldsymbol{\beta}}^{LS})$ . Though, in small sample size,  $\widehat{V}(d; \hat{\boldsymbol{\beta}}^{opt2})$  is preferred since it utilizes all the available data and is much more stable. When both models are correct, by noting that  $\boldsymbol{\beta}^{opt} = \boldsymbol{\beta}_0 = \boldsymbol{\beta}_{LS}^*$ , all three estimators have the same asymptotic variance.

*Proof.* For the usual DR estimator  $\widehat{V}(d; \hat{\boldsymbol{\beta}}^{LS})$ , the estimating equation  $\mathbf{m}(\mathbf{U}_i, \boldsymbol{\theta})$  is given by

$$\mathbf{m}(\mathbf{U}_i, \boldsymbol{\theta}) = \left( \begin{array}{c} Q_{\boldsymbol{\beta}}(\mathbf{X}_i, A_i; \boldsymbol{\beta}) \{Y_i - Q(\mathbf{X}_i, A_i; \boldsymbol{\beta})\} \\ \frac{I\{A_i = d(\mathbf{X}_i)\}}{\pi\{d(\mathbf{X}_i), \mathbf{X}_i\}} [Y_i - Q\{\mathbf{X}_i, d(\mathbf{X}_i); \boldsymbol{\beta}\}] + Q\{\mathbf{X}_i, d(\mathbf{X}_i); \boldsymbol{\beta}\} - V(d) \end{array} \right).$$

When either the propensity score or the outcome model is correct, the true values are  $\boldsymbol{\theta}_0^{LS} = (\boldsymbol{\beta}_{LS}^{*\top}, V(d))^\top$  where  $\boldsymbol{\beta}_{LS}^*$  satisfies  $E[Q_{\boldsymbol{\beta}}(\mathbf{X}, A; \boldsymbol{\beta}_{LS}^*) \{Y - Q(\mathbf{X}, A; \boldsymbol{\beta}_{LS}^*)\}] = \mathbf{0}$ . By M-estimation theory,  $\hat{\boldsymbol{\theta}}^{LS} \triangleq (\{\hat{\boldsymbol{\beta}}^{LS}\}^\top, \widehat{V}(d; \hat{\boldsymbol{\beta}}^{LS}))^\top$  is asymptotically normal,

$$\sqrt{n}(\hat{\boldsymbol{\theta}}^{LS} - \boldsymbol{\theta}_0^{LS}) \xrightarrow{D} N(0, \{\mathbf{B}^{LS}(\boldsymbol{\theta}_0^{LS})\}^{-1} \mathbf{C}^{LS}(\boldsymbol{\theta}_0^{LS}) [\{\mathbf{B}^{LS}(\boldsymbol{\theta}_0^{LS})\}^{-1}]^\top),$$

where

$$\mathbf{B}^{\text{LS}}(\boldsymbol{\theta}) = \begin{pmatrix} \mathbf{B}_1^{\text{LS}}(\boldsymbol{\theta}) & \mathbf{0}_{s \times 1} \\ \mathbf{B}_2(\boldsymbol{\theta}) & -1 \end{pmatrix} \quad \mathbf{C}^{\text{LS}}(\boldsymbol{\theta}) = \begin{pmatrix} \mathbf{C}_{11}^{\text{LS}}(\boldsymbol{\theta}) & \mathbf{C}_{12}^{\text{LS}}(\boldsymbol{\theta}) \\ \{\mathbf{C}_{12}^{\text{LS}}(\boldsymbol{\theta})\}^\top & \mathbf{C}_{22}(\boldsymbol{\theta}) \end{pmatrix},$$

with all the quantities defined in the theorem. After some algebra, we obtain

$$\sqrt{n} \left\{ \widehat{V}(d; \widehat{\boldsymbol{\beta}}^{\text{LS}}) - V(d) \right\} \xrightarrow{D} N(0, U_1(\boldsymbol{\theta}_0^{\text{LS}})),$$

where  $U_1(\boldsymbol{\theta}) = \mathbf{B}_2(\boldsymbol{\theta})\{\mathbf{B}_1^{\text{LS}}(\boldsymbol{\theta})\}^{-1}\mathbf{C}_{11}^{\text{LS}}(\boldsymbol{\theta})\{\mathbf{B}_1^{\text{LS}}(\boldsymbol{\theta})\}^{-1}\mathbf{B}_2^\top(\boldsymbol{\theta}) - 2\mathbf{B}_2(\boldsymbol{\theta})\{\mathbf{B}_1^{\text{LS}}(\boldsymbol{\theta})\}^{-1}\mathbf{C}_{12}^{\text{LS}}(\boldsymbol{\theta}) + \mathbf{C}_{22}(\boldsymbol{\theta})$ .

For the improved DR estimator with IPW estimating equation  $\widehat{V}(d; \widehat{\boldsymbol{\beta}}^{\text{opt1}})$ ,  $\mathbf{m}(\mathbf{U}_i, \boldsymbol{\theta})$  is given by

$$\mathbf{m}(\mathbf{U}_i, \boldsymbol{\theta}) = \begin{pmatrix} \frac{I\{A_i = d(\mathbf{X}_i)\}}{\pi\{d(\mathbf{X}_i), \mathbf{X}_i\}} \cdot \frac{1 - \pi\{d(\mathbf{X}_i), \mathbf{X}_i\}}{\pi\{d(\mathbf{X}_i), \mathbf{X}_i\}} \left[ Y_i - Q\{\mathbf{X}_i, d(\mathbf{X}_i); \boldsymbol{\beta}\} \right] Q_{\boldsymbol{\beta}}\{\mathbf{X}_i, d(\mathbf{X}_i); \boldsymbol{\beta}\} \\ \frac{I\{A_i = d(\mathbf{X}_i)\}}{\pi\{d(\mathbf{X}_i), \mathbf{X}_i\}} \left[ Y_i - Q\{\mathbf{X}_i, d(\mathbf{X}_i); \boldsymbol{\beta}\} \right] + Q\{\mathbf{X}_i, d(\mathbf{X}_i); \boldsymbol{\beta}\} - V(d) \end{pmatrix}.$$

The true values are  $\boldsymbol{\theta}_0^{\text{opt1}} = (\boldsymbol{\beta}_{\text{opt1}}^*{}^\top, V(d))^\top$  where  $\boldsymbol{\beta}_{\text{opt1}}^*$  satisfies

$$E \left( \frac{I\{A = d(\mathbf{X})\}}{\pi\{d(\mathbf{X}), \mathbf{X}\}} \cdot \frac{1 - \pi\{d(\mathbf{X}), \mathbf{X}\}}{\pi\{d(\mathbf{X}), \mathbf{X}\}} \left[ Y - Q\{\mathbf{X}, d(\mathbf{X}); \boldsymbol{\beta}_{\text{opt1}}^*\} \right] Q_{\boldsymbol{\beta}}\{\mathbf{X}, d(\mathbf{X}); \boldsymbol{\beta}_{\text{opt1}}^*\} \right) = \mathbf{0}.$$

Again by M-estimation theory,  $\widehat{\boldsymbol{\theta}}^{\text{opt1}} \triangleq (\{\widehat{\boldsymbol{\beta}}^{\text{opt1}}\}^\top, \widehat{V}(d; \widehat{\boldsymbol{\beta}}^{\text{opt1}}))^\top$  is asymptotically normal,

$$\sqrt{n}(\widehat{\boldsymbol{\theta}}^{\text{opt1}} - \boldsymbol{\theta}_0^{\text{opt1}}) \xrightarrow{D} N(0, \{\mathbf{B}^{\text{opt1}}(\boldsymbol{\theta}_0^{\text{opt1}})\}^{-1} \mathbf{C}^{\text{opt1}}(\boldsymbol{\theta}_0^{\text{opt1}}) [\{\mathbf{B}^{\text{opt1}}(\boldsymbol{\theta}_0^{\text{opt1}})\}^{-1}]^\top),$$

where

$$\mathbf{B}^{\text{opt1}}(\boldsymbol{\theta}) = \begin{pmatrix} \mathbf{B}_1^{\text{opt1}}(\boldsymbol{\theta}) & \mathbf{0}_{s \times 1} \\ \mathbf{B}_2(\boldsymbol{\theta}) & -1 \end{pmatrix} \quad \mathbf{C}^{\text{opt1}}(\boldsymbol{\theta}) = \begin{pmatrix} \mathbf{C}_{11}^{\text{opt1}}(\boldsymbol{\theta}) & \mathbf{C}_{12}^{\text{opt1}}(\boldsymbol{\theta}) \\ \{\mathbf{C}_{12}^{\text{opt1}}(\boldsymbol{\theta})\}^\top & \mathbf{C}_{22}(\boldsymbol{\theta}) \end{pmatrix},$$

with all the quantities defined in the theorem. The rest is by some simple algebra.

For the improved DR estimator with *augmented* IPW estimating equation  $\widehat{V}(d; \widehat{\boldsymbol{\beta}}^{\text{opt2}})$ , the estimating equation is  $\mathbf{m}^{\text{opt2}}(\mathbf{U}_i, \boldsymbol{\theta}, g, h) = (\mathbf{m}_1(\mathbf{U}_i, \boldsymbol{\theta}, g, h)^\top, m_2(\mathbf{U}_i, \boldsymbol{\theta}))^\top$  where

$$\begin{aligned} \mathbf{m}_1(\mathbf{U}, \boldsymbol{\theta}, g, h) &= \frac{I\{A = d(\mathbf{X})\}}{\pi\{d(\mathbf{X}), \mathbf{X}\}} \cdot \frac{1 - \pi\{d(\mathbf{X}), \mathbf{X}\}}{\pi\{d(\mathbf{X}), \mathbf{X}\}} \left[ Y - Q\{\mathbf{X}, d(\mathbf{X}); \boldsymbol{\beta}\} \right] Q_{\boldsymbol{\beta}}\{\mathbf{X}, d(\mathbf{X}); \boldsymbol{\beta}\} \\ &\quad - \left( \frac{I\{A = d(\mathbf{X})\} - \pi\{d(\mathbf{X}), \mathbf{X}\}}{\pi\{d(\mathbf{X}), \mathbf{X}\}} \cdot \frac{1 - \pi\{d(\mathbf{X}), \mathbf{X}\}}{\pi\{d(\mathbf{X}), \mathbf{X}\}} \cdot \right. \\ &\quad \left. \left[ g(\mathbf{X})I\{d(\mathbf{X}) = 1\} + h(\mathbf{X})I\{d(\mathbf{X}) = -1\} - Q\{\mathbf{X}, d(\mathbf{X}); \boldsymbol{\beta}\} \right] Q_{\boldsymbol{\beta}}\{\mathbf{X}, d(\mathbf{X}); \boldsymbol{\beta}\} \right), \\ m_2(\mathbf{U}, \boldsymbol{\theta}) &= \frac{I\{A = d(\mathbf{X})\}}{\pi\{d(\mathbf{X}), \mathbf{X}\}} [Y - Q\{\mathbf{X}, d(\mathbf{X}); \boldsymbol{\beta}\}] + Q\{\mathbf{X}, d(\mathbf{X}); \boldsymbol{\beta}\} - V(d). \end{aligned}$$

The true values are  $\boldsymbol{\theta}_0^{\text{opt2}} = (\boldsymbol{\beta}_{\text{opt2}}^*{}^\top, V(d))^\top$  where  $\boldsymbol{\beta}_{\text{opt2}}^*$  satisfies

$$\begin{aligned} &E \left( \frac{I\{A = d(\mathbf{X})\}}{\pi\{d(\mathbf{X}), \mathbf{X}\}} \cdot \frac{1 - \pi\{d(\mathbf{X}), \mathbf{X}\}}{\pi\{d(\mathbf{X}), \mathbf{X}\}} \left[ Y - Q\{\mathbf{X}, d(\mathbf{X}); \boldsymbol{\beta}_{\text{opt2}}^*\} \right] Q_{\boldsymbol{\beta}}\{\mathbf{X}, d(\mathbf{X}); \boldsymbol{\beta}_{\text{opt2}}^*\} \right) \\ &- E \left( \frac{I\{A = d(\mathbf{X})\} - \pi\{d(\mathbf{X}), \mathbf{X}\}}{\pi\{d(\mathbf{X}), \mathbf{X}\}} \cdot \frac{1 - \pi\{d(\mathbf{X}), \mathbf{X}\}}{\pi\{d(\mathbf{X}), \mathbf{X}\}} \cdot \right. \\ &\quad \left. \left[ Q_0\{\mathbf{X}, d(\mathbf{X})\} - Q\{\mathbf{X}, d(\mathbf{X}); \boldsymbol{\beta}_{\text{opt2}}^*\} \right] Q_{\boldsymbol{\beta}}\{\mathbf{X}, d(\mathbf{X}); \boldsymbol{\beta}_{\text{opt2}}^*\} \right) = \mathbf{0}. \end{aligned}$$

Let us define  $\mathbf{M}^{\text{opt2}}(\boldsymbol{\theta}, g, h) = E\{\mathbf{m}^{\text{opt2}}(\mathbf{U}_i, \boldsymbol{\theta}, g, h)\}$  and  $\mathbf{M}_n^{\text{opt2}}(\boldsymbol{\theta}, g, h) = n^{-1} \sum_{i=1}^n \mathbf{m}^{\text{opt2}}(\mathbf{U}_i, \boldsymbol{\theta}, g, h)$ .

Now we calculate all the ordinary and functional derivatives in Theorem S1. The ordinary derivative of  $\mathbf{M}^{\text{opt2}}(\boldsymbol{\theta}, g_0, h_0)$  with respect to  $\boldsymbol{\theta}$  is

$$\boldsymbol{\Gamma}_1^{\text{opt2}}(\boldsymbol{\theta}, g_0, h_0) = \begin{pmatrix} \mathbf{B}_1^{\text{opt2}}(\boldsymbol{\theta}) & \mathbf{0}_{s \times 1} \\ \mathbf{B}_2(\boldsymbol{\theta}) & -1 \end{pmatrix}$$

where  $\mathbf{B}_1^{\text{opt2}}(\boldsymbol{\theta}) = E\{\partial \mathbf{m}_1(\mathbf{U}_i, \boldsymbol{\theta}, g_0, h_0) / \partial \boldsymbol{\beta}^\top\}$ . The functional derivatives are

$$\boldsymbol{\Gamma}_2^{\text{opt2}}(\boldsymbol{\theta}, g, h)[\bar{g} - g] = \begin{pmatrix} \boldsymbol{\Gamma}_{21}^{\text{opt2}}(\boldsymbol{\theta}, g, h)[\bar{g} - g] \\ 0 \end{pmatrix} \quad \boldsymbol{\Gamma}_3^{\text{opt2}}(\boldsymbol{\theta}, g, h)[\bar{h} - h] = \begin{pmatrix} \boldsymbol{\Gamma}_{31}^{\text{opt2}}(\boldsymbol{\theta}, g, h)[\bar{h} - h] \\ 0 \end{pmatrix}$$

where

$$\begin{aligned}\Gamma_{21}^{\text{opt2}}(\boldsymbol{\theta}, g, h)[\bar{g} - g] &= E\left(-\frac{I\{A = d(\mathbf{X})\} - \pi\{d(\mathbf{X}), \mathbf{X}\}}{\pi\{d(\mathbf{X}), \mathbf{X}\}} \cdot \frac{1 - \pi\{d(\mathbf{X}), \mathbf{X}\}}{\pi\{d(\mathbf{X}), \mathbf{X}\}} \cdot \right. \\ &\quad \left. \{\bar{g}(\mathbf{X}) - g(\mathbf{X})\} I\{d(\mathbf{X}) = 1\} Q_{\beta}\{\mathbf{X}, d(\mathbf{X}); \boldsymbol{\beta}\}\right), \\ \Gamma_{31}^{\text{opt2}}(\boldsymbol{\theta}, g, h)[\bar{h} - h] &= E\left(-\frac{I\{A = d(\mathbf{X})\} - \pi\{d(\mathbf{X}), \mathbf{X}\}}{\pi\{d(\mathbf{X}), \mathbf{X}\}} \cdot \frac{1 - \pi\{d(\mathbf{X}), \mathbf{X}\}}{\pi\{d(\mathbf{X}), \mathbf{X}\}} \cdot \right. \\ &\quad \left. \{\bar{h}(\mathbf{X}) - h(\mathbf{X})\} I\{d(\mathbf{X}) = -1\} Q_{\beta}\{\mathbf{X}, d(\mathbf{X}); \boldsymbol{\beta}\}\right).\end{aligned}$$

Verification of the conditions (1.1)-(1.3) in Theorem S1 is standard. Condition (1.4) can be easily verified using well-known results on kernel estimation. By Section 4 of Chen et al. (2003), condition (1.5) is met since  $\mathbf{m}^{\text{opt2}}(\mathbf{U}, \boldsymbol{\theta}, g, h)$  is (pointwise) Lipschitz continuous with respect to  $(\boldsymbol{\theta}, g, h)$ . Now we investigate the asymptotic properties of  $\sqrt{n}\Gamma_{21}^{\text{opt2}}(\boldsymbol{\theta}, g_0, h_0)[\hat{g} - g_0]$  and  $\sqrt{n}\Gamma_{31}^{\text{opt2}}(\boldsymbol{\theta}, g_0, h_0)[\hat{h} - h_0]$  where  $\hat{g}, \hat{h}$  are kernel regression estimators. Notice that

$$\begin{aligned}\Gamma_{21}^{\text{opt2}}(\boldsymbol{\theta}, g_0, h_0)[\hat{g} - g_0] &= \int \left(-\frac{\pi_0\{d(\mathbf{x}), \mathbf{x}\} - \pi\{d(\mathbf{x}), \mathbf{x}\}}{\pi\{d(\mathbf{x}), \mathbf{x}\}} \cdot \frac{1 - \pi\{d(\mathbf{x}), \mathbf{x}\}}{\pi\{d(\mathbf{x}), \mathbf{x}\}} \cdot \right. \\ &\quad \left. \{\hat{g}(\mathbf{x}) - g_0(\mathbf{x})\} I\{d(\mathbf{x}) = 1\} Q_{\beta}\{\mathbf{x}, d(\mathbf{x}); \boldsymbol{\beta}\}\right) f_{\mathbf{X}}(\mathbf{x}) d\mathbf{x}.\end{aligned}$$

where  $f_{\mathbf{X}}(\cdot)$  is the density function of  $\mathbf{X}$ . Recall that

$$\hat{g}(\mathbf{x}) = \frac{\sum_{i=1}^n K_{\mathbf{H}}(\mathbf{x} - \mathbf{X}_i) I(A_i = 1) Y_i}{\sum_{i=1}^n K_{\mathbf{H}}(\mathbf{x} - \mathbf{X}_i) I(A_i = 1)}.$$

By remark 3.3 in Ichimura and Lee (2010), we know that

$$\hat{g}(\mathbf{x}) - g_0(\mathbf{x}) = \frac{1}{n} \sum_{i=1}^n \frac{Y_i - E(Y | \mathbf{X} = \mathbf{X}_i, A = 1)}{f_{\mathbf{X}, A}(\mathbf{x}, 1)} K_{\mathbf{H}}(\mathbf{x} - \mathbf{X}_i) I(A_i = 1) + o_p(n^{-1/2})$$



where  $f_{\mathbf{X},A}(\cdot, \cdot)$  is the joint density of  $(\mathbf{X}, A)$ . Therefore,

$$\Gamma_{21}^{\text{opt2}}(\boldsymbol{\theta}, g_0, h_0)[\hat{g} - g_0] = \frac{1}{n} \sum_{i=1}^n \left[ \{Y_i - g_0(\mathbf{X}_i)\} I(A_i = 1) \cdot \int \left( -\frac{\pi_0\{d(\mathbf{x}), \mathbf{x}\} - \pi\{d(\mathbf{x}), \mathbf{x}\}}{\pi\{d(\mathbf{x}), \mathbf{x}\}} \cdot \frac{1 - \pi\{d(\mathbf{x}), \mathbf{x}\}}{\pi\{d(\mathbf{x}), \mathbf{x}\}} \cdot \frac{K_H(\mathbf{x} - \mathbf{X}_i)}{f_{\mathbf{X},A}(\mathbf{x}, 1)} I\{d(\mathbf{x}) = 1\} Q_\beta\{\mathbf{x}, d(\mathbf{x}); \boldsymbol{\beta}\} \right) f_{\mathbf{X}}(\mathbf{x}) d\mathbf{x} \right]$$

plus an  $o_p(n^{-1/2})$  term. Similar to Example 1 in Chen et al. (2003), by using standard change of variables and Taylor expansion we have

$$\Gamma_{21}^{\text{opt2}}(\boldsymbol{\theta}, g_0, h_0)[\hat{g} - g_0] = \frac{1}{n} \sum_{i=1}^n \mathbf{q}_1(\mathbf{U}_i, \boldsymbol{\theta}, g_0, h_0) + o_p(n^{-1/2})$$

where

$$\mathbf{q}_1(\mathbf{U}_i, \boldsymbol{\theta}, g_0, h_0) = -\{Y_i - g_0(\mathbf{X}_i)\} \frac{I(A_i = 1) f_{\mathbf{X}}(\mathbf{X}_i)}{f_{\mathbf{X},A}(\mathbf{X}_i, 1)} \cdot \frac{\pi_0\{d(\mathbf{X}_i), \mathbf{X}_i\} - \pi\{d(\mathbf{X}_i), \mathbf{X}_i\}}{\pi\{d(\mathbf{X}_i), \mathbf{X}_i\}} \cdot \frac{1 - \pi\{d(\mathbf{X}_i), \mathbf{X}_i\}}{\pi\{d(\mathbf{X}_i), \mathbf{X}_i\}} I\{d(\mathbf{X}_i) = 1\} Q_\beta\{\mathbf{X}_i, d(\mathbf{X}_i); \boldsymbol{\beta}\}.$$

Similarly,

$$\Gamma_{31}^{\text{opt2}}(\boldsymbol{\theta}, g_0, h_0)[\hat{h} - h_0] = \frac{1}{n} \sum_{i=1}^n \mathbf{q}_2(\mathbf{U}_i, \boldsymbol{\theta}, g_0, h_0) + o_p(n^{-1/2})$$

where

$$\mathbf{q}_2(\mathbf{U}_i, \boldsymbol{\theta}, g_0, h_0) = -\{Y_i - h_0(\mathbf{X}_i)\} \frac{I(A_i = -1) f_{\mathbf{X}}(\mathbf{X}_i)}{f_{\mathbf{X},A}(\mathbf{X}_i, -1)} \cdot \frac{\pi_0\{d(\mathbf{X}_i), \mathbf{X}_i\} - \pi\{d(\mathbf{X}_i), \mathbf{X}_i\}}{\pi\{d(\mathbf{X}_i), \mathbf{X}_i\}} \cdot \frac{1 - \pi\{d(\mathbf{X}_i), \mathbf{X}_i\}}{\pi\{d(\mathbf{X}_i), \mathbf{X}_i\}} I\{d(\mathbf{X}_i) = -1\} Q_\beta\{\mathbf{X}_i, d(\mathbf{X}_i); \boldsymbol{\beta}\}.$$

Combining the above results, we have

$$\sqrt{n} \left\{ \mathbf{M}_n^{\text{opt2}}(\boldsymbol{\theta}, g_0, h_0) + \Gamma_2^{\text{opt2}}(\boldsymbol{\theta}, g_0, h_0)[\hat{g} - g_0] + \Gamma_3^{\text{opt2}}(\boldsymbol{\theta}, g_0, h_0)[\hat{h} - h_0] \right\} \xrightarrow{D} N(\mathbf{0}, \mathbf{C}^{\text{opt2}}(\boldsymbol{\theta})),$$

where

$$\mathbf{C}^{\text{opt2}}(\boldsymbol{\theta}) = \begin{pmatrix} \mathbf{C}_{11}^{\text{opt2}}(\boldsymbol{\theta}) & \mathbf{C}_{12}^{\text{opt2}}(\boldsymbol{\theta}) \\ \{\mathbf{C}_{12}^{\text{opt2}}(\boldsymbol{\theta})\}^\top & \mathbf{C}_{22}(\boldsymbol{\theta}) \end{pmatrix},$$

$$\mathbf{C}_{11}^{\text{opt2}}(\boldsymbol{\theta}) = E \{(\mathbf{m}_1 + \mathbf{q}_1 + \mathbf{q}_2)(\mathbf{m}_1 + \mathbf{q}_1 + \mathbf{q}_2)^\top\}, \quad \mathbf{C}_{12}^{\text{opt2}}(\boldsymbol{\theta}) = E \{(\mathbf{m}_1 + \mathbf{q}_1 + \mathbf{q}_2)m_2\}.$$

Here  $\mathbf{m}_1, m_2, \mathbf{q}_1, \mathbf{q}_2$  are shorthand for  $\mathbf{m}_1(\mathbf{U}_i, \boldsymbol{\theta}, g_0, h_0), m_2(\mathbf{U}_i, \boldsymbol{\theta}), \mathbf{q}_1(\mathbf{U}_i, \boldsymbol{\theta}, g_0, h_0), \mathbf{q}_2(\mathbf{U}_i, \boldsymbol{\theta}, g_0, h_0)$ .

Based on Theorem S1,  $\hat{\boldsymbol{\theta}}^{\text{opt2}} \triangleq (\{\hat{\boldsymbol{\beta}}^{\text{opt2}}\}^\top, \widehat{V}(d; \hat{\boldsymbol{\beta}}^{\text{opt2}}))^\top$  is asymptotically normal,

$$\sqrt{n}(\hat{\boldsymbol{\theta}}^{\text{opt2}} - \boldsymbol{\theta}_0^{\text{opt2}}) \xrightarrow{D} N(0, \boldsymbol{\Omega}^{\text{opt2}}(\boldsymbol{\theta}_0^{\text{opt2}})),$$

where  $\boldsymbol{\Omega}^{\text{opt2}}(\boldsymbol{\theta}) = \boldsymbol{\Gamma}_1^{\text{opt2}}(\boldsymbol{\theta}, g_0, h_0)^{-1} \mathbf{C}^{\text{opt2}}(\boldsymbol{\theta}) \{\boldsymbol{\Gamma}_1^{\text{opt2}}(\boldsymbol{\theta}, g_0, h_0)^{-1}\}^\top$ . By some algebra, we obtain

$$\sqrt{n} \left\{ \widehat{V}(d; \hat{\boldsymbol{\beta}}^{\text{opt2}}) - V(d) \right\} \xrightarrow{D} N(0, U_3(\boldsymbol{\theta}_0^{\text{opt2}})),$$

where  $U_3(\boldsymbol{\theta}) = \mathbf{B}_2(\boldsymbol{\theta}) \{\mathbf{B}_1^{\text{opt2}}(\boldsymbol{\theta})\}^{-1} \mathbf{C}_{11}^{\text{opt2}}(\boldsymbol{\theta}) \{\mathbf{B}_1^{\text{opt2}}(\boldsymbol{\theta})\}^{-1} \mathbf{B}_2^\top(\boldsymbol{\theta}) - 2\mathbf{B}_2(\boldsymbol{\theta}) \{\mathbf{B}_1^{\text{opt2}}(\boldsymbol{\theta})\}^{-1} \mathbf{C}_{12}^{\text{opt2}}(\boldsymbol{\theta}) + \mathbf{C}_{22}(\boldsymbol{\theta})$ .

□

## Appendix D: Details and proof of Theorem 2

To investigate asymptotic properties of  $\widehat{V}(d; \hat{\boldsymbol{\gamma}}, \hat{\boldsymbol{\beta}}^{\text{opt3}})$  and  $\widehat{V}(d; \hat{\boldsymbol{\gamma}}, \hat{\boldsymbol{\beta}}^{\text{opt4}})$ , we introduce additional parameters  $\boldsymbol{\zeta} = (\boldsymbol{\alpha}^\top, \boldsymbol{\psi}^\top, \boldsymbol{\phi}^\top)^\top$  to account for  $\widehat{\Sigma}_{\boldsymbol{\gamma}\boldsymbol{\gamma}}, \widehat{\Gamma}(\boldsymbol{\beta}), \widehat{\Phi}(\boldsymbol{\beta})$ . Here,  $\boldsymbol{\alpha}$  corresponds to  $-E \{\partial \tilde{\varphi}(Y, A, \mathbf{X}, \boldsymbol{\gamma}, \boldsymbol{\beta}) / \partial \boldsymbol{\gamma}\}$ ,  $\boldsymbol{\psi} = (\boldsymbol{\psi}_1^\top, \dots, \boldsymbol{\psi}_q^\top)^\top$  where  $\boldsymbol{\psi}_j$  corresponds to the  $j$ -th column of  $E \{S_\gamma(A, \mathbf{X}, \boldsymbol{\gamma}) S_\gamma^\top(A, \mathbf{X}, \boldsymbol{\gamma})\}$ , and  $\boldsymbol{\phi} = (\boldsymbol{\phi}_1^\top, \dots, \boldsymbol{\phi}_q^\top)^\top$  where  $\boldsymbol{\phi}_j$  corresponds to  $-E \{\partial^2 \tilde{\varphi}(Y, A, \mathbf{X}, \boldsymbol{\gamma}, \boldsymbol{\beta}) / \partial \gamma_j \partial \boldsymbol{\beta}\}$ . We use  $[\boldsymbol{\phi}_1, \dots, \boldsymbol{\phi}_q]$  to represent a matrix with  $j$ -th column being  $\boldsymbol{\phi}_j$ , similarly for  $[\boldsymbol{\psi}_1, \dots, \boldsymbol{\psi}_q]$ . In addition, define  $S_{\boldsymbol{\gamma}\boldsymbol{\gamma}}(A, \mathbf{X}; \boldsymbol{\gamma}) \triangleq \partial S_\gamma(A, \mathbf{X}; \boldsymbol{\gamma}) / \partial \boldsymbol{\gamma}^\top$ , let  $r$  be the dimension of  $\boldsymbol{\zeta}$ , and let  $\text{col}_j \{\cdot\}$  denote the  $j$ -th column of a matrix.

**Theorem 2.** (Asymptotic normality when there is nuisance parameter in the propensity score model). To obtain  $\widehat{V}(d; \widehat{\gamma}, \widehat{\beta}^{LS})$ , the unknown parameters are  $\boldsymbol{\theta} = (\boldsymbol{\gamma}^\top, \boldsymbol{\beta}^\top, V(d))^\top$ . When either the propensity score or the outcome model is correct,

$$\sqrt{n} \left\{ \widehat{V}(d; \widehat{\gamma}, \widehat{\beta}^{LS}) - V(d) \right\} \xrightarrow{D} N(0, U_4(\boldsymbol{\theta}_0^{LS2})),$$

where

$$\begin{aligned} U_4(\boldsymbol{\theta}) &= \mathbf{D}_2^{LS2}(\boldsymbol{\theta}) \{ \mathbf{D}_1^{LS2}(\boldsymbol{\theta}) \}^{-1} \mathbf{F}_{11}^{LS2}(\boldsymbol{\theta}) \{ \mathbf{D}_1^{LS2}(\boldsymbol{\theta}) \}^{-1} \{ \mathbf{D}_2^{LS2}(\boldsymbol{\theta}) \}^\top \\ &\quad - 2 \mathbf{D}_2^{LS2}(\boldsymbol{\theta}) \{ \mathbf{D}_1^{LS2}(\boldsymbol{\theta}) \}^{-1} \mathbf{F}_{12}^{LS2}(\boldsymbol{\theta}) + \mathbf{F}_{22}(\boldsymbol{\theta}). \end{aligned}$$

Here,

$$\mathbf{D}_1^{LS2}(\boldsymbol{\theta}) = \begin{pmatrix} \mathbf{J}_1(\boldsymbol{\theta}) & \mathbf{0}_{q \times s} \\ \mathbf{0}_{s \times q} & \mathbf{J}_2(\boldsymbol{\theta}) \end{pmatrix}, \quad \mathbf{D}_2^{LS2}(\boldsymbol{\theta}) = \begin{pmatrix} \mathbf{J}_3(\boldsymbol{\theta}) & \mathbf{J}_4(\boldsymbol{\theta}) \end{pmatrix},$$

$$\mathbf{F}_{11}^{LS2}(\boldsymbol{\theta}) = \begin{pmatrix} \mathbf{J}_5(\boldsymbol{\theta}) & \mathbf{J}_6(\boldsymbol{\theta}) \\ \{ \mathbf{J}_6(\boldsymbol{\theta}) \}^\top & \mathbf{J}_7(\boldsymbol{\theta}) \end{pmatrix}, \quad \mathbf{F}_{12}^{LS2}(\boldsymbol{\theta}) = \begin{pmatrix} \mathbf{J}_8(\boldsymbol{\theta}) \\ \mathbf{J}_9(\boldsymbol{\theta}) \end{pmatrix}, \quad \mathbf{F}_{22}(\boldsymbol{\theta}) = E \{ \tilde{\varphi}(Y, A, \mathbf{X}, \boldsymbol{\gamma}, \boldsymbol{\beta}) \}^2,$$

where

$$\begin{aligned} \mathbf{J}_1(\boldsymbol{\theta}) &= E \{ S_{\boldsymbol{\gamma}\boldsymbol{\gamma}}(A, \mathbf{X}; \boldsymbol{\gamma}) \}, \\ \mathbf{J}_2(\boldsymbol{\theta}) &= E [ Q_{\boldsymbol{\beta}\boldsymbol{\beta}}(\mathbf{X}, A; \boldsymbol{\beta}) \{ Y - Q(\mathbf{X}, A; \boldsymbol{\beta}) \} - Q_{\boldsymbol{\beta}}(\mathbf{X}, A; \boldsymbol{\beta}) Q_{\boldsymbol{\beta}}^\top(\mathbf{X}, A; \boldsymbol{\beta}) ], \\ \mathbf{J}_3(\boldsymbol{\theta}) &= E \{ \partial \tilde{\varphi}(Y, A, \mathbf{X}, \boldsymbol{\gamma}, \boldsymbol{\beta}) / \partial \boldsymbol{\gamma}^\top \}, \\ \mathbf{J}_4(\boldsymbol{\theta}) &= E \left[ \left( 1 - \frac{I\{A = d(\mathbf{X})\}}{\pi\{d(\mathbf{X}), \mathbf{X}; \boldsymbol{\gamma}\}} \right) Q_{\boldsymbol{\beta}}^\top(\mathbf{X}, d(\mathbf{X}); \boldsymbol{\beta}) \right], \\ \mathbf{J}_5(\boldsymbol{\theta}) &= E \{ S_{\boldsymbol{\gamma}}(A, \mathbf{X}; \boldsymbol{\gamma}) S_{\boldsymbol{\gamma}}^\top(A, \mathbf{X}; \boldsymbol{\gamma}) \}, \\ \mathbf{J}_6(\boldsymbol{\theta}) &= E [ S_{\boldsymbol{\gamma}}(A, \mathbf{X}; \boldsymbol{\gamma}) Q_{\boldsymbol{\beta}}^\top(\mathbf{X}, A; \boldsymbol{\beta}) \{ Y - Q(\mathbf{X}, A; \boldsymbol{\beta}) \} ], \\ \mathbf{J}_7(\boldsymbol{\theta}) &= E [ \{ Y - Q(\mathbf{X}, A; \boldsymbol{\beta}) \}^2 Q_{\boldsymbol{\beta}}(\mathbf{X}, A; \boldsymbol{\beta}) Q_{\boldsymbol{\beta}}^\top(\mathbf{X}, A; \boldsymbol{\beta}) ], \\ \mathbf{J}_8(\boldsymbol{\theta}) &= E \{ S_{\boldsymbol{\gamma}}(A, \mathbf{X}; \boldsymbol{\gamma}) \tilde{\varphi}(Y, A, \mathbf{X}, \boldsymbol{\gamma}, \boldsymbol{\beta}) \}, \\ \mathbf{J}_9(\boldsymbol{\theta}) &= E [ Q_{\boldsymbol{\beta}}(\mathbf{X}, A; \boldsymbol{\beta}) \{ Y - Q(\mathbf{X}, A; \boldsymbol{\beta}) \} \tilde{\varphi}(Y, A, \mathbf{X}, \boldsymbol{\gamma}, \boldsymbol{\beta}) ]. \end{aligned}$$

The true values are  $\boldsymbol{\theta}_0^{LS2} = (\boldsymbol{\gamma}^{*\top}, \boldsymbol{\beta}_{LS}^{*\top}, V(d))^\top$  where  $\boldsymbol{\gamma}^*$  satisfies  $E\{S_\gamma(A, \mathbf{X}; \boldsymbol{\gamma}^*)\} = \mathbf{0}$  and  $\boldsymbol{\beta}_{LS}^*$  satisfies  $E[Q_\beta(\mathbf{X}, A; \boldsymbol{\beta}_{LS}^*)\{Y - Q(\mathbf{X}, A; \boldsymbol{\beta}_{LS}^*)\}] = \mathbf{0}$ .

To obtain  $\widehat{V}(d; \hat{\boldsymbol{\gamma}}, \hat{\boldsymbol{\beta}}^{opt3})$ , the unknown parameters are  $\boldsymbol{\theta} = (\boldsymbol{\gamma}^\top, \boldsymbol{\zeta}^\top, \boldsymbol{\beta}^\top, V(d))^\top$ . When either the propensity score or the outcome model is correct,

$$\sqrt{n} \left\{ \widehat{V}(d; \hat{\boldsymbol{\gamma}}, \hat{\boldsymbol{\beta}}^{opt3}) - V(d) \right\} \xrightarrow{D} N(0, U_5(\boldsymbol{\theta}_0^{opt3}))$$

where

$$U_5(\boldsymbol{\theta}) = \mathbf{D}_2^{opt3}(\boldsymbol{\theta}) \{ \mathbf{D}_1^{opt3}(\boldsymbol{\theta}) \}^{-1} \mathbf{F}_{11}^{opt3}(\boldsymbol{\theta}) \{ \mathbf{D}_1^{opt3}(\boldsymbol{\theta}) \}^{-1} \{ \mathbf{D}_2^{opt3}(\boldsymbol{\theta}) \}^\top \\ - 2 \mathbf{D}_2^{opt3}(\boldsymbol{\theta}) \{ \mathbf{D}_1^{opt3}(\boldsymbol{\theta}) \}^{-1} \mathbf{F}_{12}^{opt3}(\boldsymbol{\theta}) + \mathbf{F}_{22}(\boldsymbol{\theta}).$$

Here,

$$\mathbf{D}_1^{opt3}(\boldsymbol{\theta}) = \begin{pmatrix} \mathbf{J}_1(\boldsymbol{\theta}) & \mathbf{0}_{q \times r} & \mathbf{0}_{q \times s} \\ E\{\partial \mathbf{m}_3 / \partial \boldsymbol{\gamma}^\top\} & E\{\partial \mathbf{m}_3 / \partial \boldsymbol{\zeta}^\top\} & E\{\partial \mathbf{m}_3 / \partial \boldsymbol{\beta}^\top\} \\ E\{\partial \mathbf{m}_4 / \partial \boldsymbol{\gamma}^\top\} & E\{\partial \mathbf{m}_4 / \partial \boldsymbol{\zeta}^\top\} & E\{\partial \mathbf{m}_4 / \partial \boldsymbol{\beta}^\top\} \end{pmatrix}, \quad \mathbf{D}_2^{opt3}(\boldsymbol{\theta}) = \begin{pmatrix} \mathbf{J}_3(\boldsymbol{\theta}) & \mathbf{0}_{1 \times r} & \mathbf{J}_4(\boldsymbol{\theta}) \end{pmatrix},$$

$$\mathbf{F}_{11}^{opt3}(\boldsymbol{\theta}) = \begin{pmatrix} \mathbf{J}_5(\boldsymbol{\theta}) & E\{S_\gamma \mathbf{m}_3^\top\} & E\{S_\gamma \mathbf{m}_4^\top\} \\ E\{\mathbf{m}_3 S_\gamma^\top\} & E\{\mathbf{m}_3 \mathbf{m}_3^\top\} & E\{\mathbf{m}_3 \mathbf{m}_4^\top\} \\ E\{\mathbf{m}_4 S_\gamma^\top\} & E\{\mathbf{m}_4 \mathbf{m}_3^\top\} & E\{\mathbf{m}_4 \mathbf{m}_4^\top\} \end{pmatrix}, \quad \mathbf{F}_{12}^{opt3}(\boldsymbol{\theta}) = \begin{pmatrix} \mathbf{J}_8(\boldsymbol{\theta}) \\ E\{\mathbf{m}_3 \tilde{\varphi}\} \\ E\{\mathbf{m}_4 \tilde{\varphi}\} \end{pmatrix}.$$

Here  $S_\gamma$ ,  $\mathbf{m}_3$ ,  $\mathbf{m}_4$ ,  $\tilde{\varphi}$  are shorthand for  $S_\gamma(A, \mathbf{X}; \boldsymbol{\gamma})$ ,  $\mathbf{m}_3(\mathbf{U}, \boldsymbol{\theta})$ ,  $\mathbf{m}_4(\mathbf{U}, \boldsymbol{\theta})$ ,  $\tilde{\varphi}(Y, A, \mathbf{X}, \boldsymbol{\gamma}, \boldsymbol{\beta})$

where

$$\mathbf{m}_3(\mathbf{U}, \boldsymbol{\theta}) = \begin{pmatrix} \boldsymbol{\alpha} + \partial \tilde{\varphi}(Y, A, \mathbf{X}, \boldsymbol{\gamma}, \boldsymbol{\beta}) / \partial \boldsymbol{\gamma} \\ \boldsymbol{\psi}_1 - \text{col}_1 \{ S_\gamma(A, \mathbf{X}, \boldsymbol{\gamma}) S_\gamma^\top(A, \mathbf{X}, \boldsymbol{\gamma}) \} \\ \dots \\ \boldsymbol{\psi}_q - \text{col}_q \{ S_\gamma(A, \mathbf{X}, \boldsymbol{\gamma}) S_\gamma^\top(A, \mathbf{X}, \boldsymbol{\gamma}) \} \\ \boldsymbol{\phi}_1 + \partial^2 \tilde{\varphi}(Y, A, \mathbf{X}, \boldsymbol{\gamma}, \boldsymbol{\beta}) / \partial \gamma_1 \partial \boldsymbol{\beta} \\ \dots \\ \boldsymbol{\phi}_q + \partial^2 \tilde{\varphi}(Y, A, \mathbf{X}, \boldsymbol{\gamma}, \boldsymbol{\beta}) / \partial \gamma_q \partial \boldsymbol{\beta} \end{pmatrix},$$

$$\mathbf{m}_4(\mathbf{U}, \boldsymbol{\theta}) = \frac{R[1 - \pi\{d(\mathbf{X}), \mathbf{X}; \gamma\}]}{\pi^2\{d(\mathbf{X}), \mathbf{X}; \gamma\}} \left[ Q_{\beta}\{\mathbf{X}, d(\mathbf{X}); \beta\} + [\phi_1, \dots, \phi_q][\psi_1, \dots, \psi_q]^{-1} \frac{\pi_{\gamma}\{d(\mathbf{X}), \mathbf{X}; \gamma\}}{1 - \pi\{d(\mathbf{X}), \mathbf{X}; \gamma\}} \right] \\ \cdot \left[ Y - Q\{\mathbf{X}, d(\mathbf{X}); \beta\} - \boldsymbol{\alpha}^{\top}[\psi_1, \dots, \psi_q]^{-1} \frac{\pi_{\gamma}\{d(\mathbf{X}), \mathbf{X}; \gamma\}}{1 - \pi\{d(\mathbf{X}), \mathbf{X}; \gamma\}} \right].$$

The true parameters are  $\boldsymbol{\theta}_0^{\text{opt3}} = (\boldsymbol{\gamma}^{*\top}, \boldsymbol{\zeta}_{\text{opt3}}^{*\top}, \boldsymbol{\beta}_{\text{opt3}}^{*\top}, V(d))^{\top}$  where  $(\boldsymbol{\zeta}_{\text{opt3}}^*, \boldsymbol{\beta}_{\text{opt3}}^*)$  is the solution to the following set of equations:

$$\boldsymbol{\alpha} + E\{\partial\tilde{\varphi}(Y, A, \mathbf{X}, \boldsymbol{\gamma}^*, \boldsymbol{\beta})/\partial\boldsymbol{\gamma}\} = \mathbf{0},$$

$$[\psi_1, \dots, \psi_q] - E\{S_{\gamma}(A, \mathbf{X}, \boldsymbol{\gamma}^*)S_{\gamma}^{\top}(A, \mathbf{X}, \boldsymbol{\gamma}^*)\} = \mathbf{0},$$

$$[\phi_1, \dots, \phi_q] + E\{\partial^2\tilde{\varphi}(Y, A, \mathbf{X}, \boldsymbol{\gamma}^*, \boldsymbol{\beta})/\partial\boldsymbol{\gamma}^{\top}\partial\boldsymbol{\beta}\} = \mathbf{0},$$

$$E\left(\frac{R[1 - \pi\{d(\mathbf{X}), \mathbf{X}; \boldsymbol{\gamma}^*\}]}{\pi^2\{d(\mathbf{X}), \mathbf{X}; \boldsymbol{\gamma}^*\}} \left[ Q_{\beta}\{\mathbf{X}, d(\mathbf{X}); \beta\} + [\phi_1, \dots, \phi_q][\psi_1, \dots, \psi_q]^{-1} \frac{\pi_{\gamma}\{d(\mathbf{X}), \mathbf{X}; \boldsymbol{\gamma}^*\}}{1 - \pi\{d(\mathbf{X}), \mathbf{X}; \boldsymbol{\gamma}^*\}} \right] \right. \\ \left. \cdot \left[ Y - Q\{\mathbf{X}, d(\mathbf{X}); \beta\} - \boldsymbol{\alpha}^{\top}[\psi_1, \dots, \psi_q]^{-1} \frac{\pi_{\gamma}\{d(\mathbf{X}), \mathbf{X}; \boldsymbol{\gamma}^*\}}{1 - \pi\{d(\mathbf{X}), \mathbf{X}; \boldsymbol{\gamma}^*\}} \right] \right) = \mathbf{0}.$$

(S.11)

To obtain  $\widehat{V}(d; \hat{\boldsymbol{\gamma}}, \hat{\boldsymbol{\beta}}^{\text{opt4}})$ , the unknown parameters are  $\boldsymbol{\theta} = (\boldsymbol{\gamma}^{\top}, \boldsymbol{\zeta}^{\top}, \boldsymbol{\beta}^{\top}, V(d))^{\top}$ . When either the propensity score or the outcome model is correct,

$$\sqrt{n} \left\{ \widehat{V}(d; \hat{\boldsymbol{\gamma}}, \hat{\boldsymbol{\beta}}^{\text{opt4}}) - V(d) \right\} \xrightarrow{D} N(0, U_6(\boldsymbol{\theta}_0^{\text{opt4}}))$$

where

$$U_6(\boldsymbol{\theta}) = \mathbf{D}_2^{\text{opt4}}(\boldsymbol{\theta})\{\mathbf{D}_1^{\text{opt4}}(\boldsymbol{\theta})\}^{-1}\mathbf{F}_{11}^{\text{opt4}}(\boldsymbol{\theta})\{\mathbf{D}_1^{\text{opt4}}(\boldsymbol{\theta})\}^{-1}\{\mathbf{D}_2^{\text{opt4}}(\boldsymbol{\theta})\}^{\top} \\ - 2\mathbf{D}_2^{\text{opt4}}(\boldsymbol{\theta})\{\mathbf{D}_1^{\text{opt4}}(\boldsymbol{\theta})\}^{-1}\mathbf{F}_{12}^{\text{opt4}}(\boldsymbol{\theta}) + \mathbf{F}_{22}(\boldsymbol{\theta}).$$

Here,

$$\mathbf{D}_1^{\text{opt4}}(\boldsymbol{\theta}) = \begin{pmatrix} \mathbf{J}_1(\boldsymbol{\theta}) & \mathbf{0}_{q \times r} & \mathbf{0}_{q \times s} \\ E\{\partial\mathbf{m}_3/\partial\boldsymbol{\gamma}^{\top}\} & E\{\partial\mathbf{m}_3/\partial\boldsymbol{\zeta}^{\top}\} & E\{\partial\mathbf{m}_3/\partial\boldsymbol{\beta}^{\top}\} \\ E\{\partial\mathbf{m}_5/\partial\boldsymbol{\gamma}^{\top}\} & E\{\partial\mathbf{m}_5/\partial\boldsymbol{\zeta}^{\top}\} & E\{\partial\mathbf{m}_5/\partial\boldsymbol{\beta}^{\top}\} \end{pmatrix},$$

$$D_2^{opt4}(\boldsymbol{\theta}) = D_2^{opt3}(\boldsymbol{\theta}) = \begin{pmatrix} \mathbf{J}_3(\boldsymbol{\theta}) & \mathbf{0}_{1 \times r} & \mathbf{J}_4(\boldsymbol{\theta}) \end{pmatrix},$$

$$\mathbf{F}_{11}^{opt4}(\boldsymbol{\theta}) = \begin{pmatrix} \mathbf{J}_5(\boldsymbol{\theta}) & E\{S_\gamma \mathbf{m}_3^\top\} & E\{S_\gamma(\mathbf{m}_5 + \mathbf{q}_3 + \mathbf{q}_4)^\top\} \\ E\{\mathbf{m}_3 S_\gamma^\top\} & E\{\mathbf{m}_3 \mathbf{m}_3^\top\} & E\{\mathbf{m}_3(\mathbf{m}_5 + \mathbf{q}_3 + \mathbf{q}_4)^\top\} \\ E\{(\mathbf{m}_5 + \mathbf{q}_3 + \mathbf{q}_4) S_\gamma^\top\} & E\{(\mathbf{m}_5 + \mathbf{q}_3 + \mathbf{q}_4) \mathbf{m}_3^\top\} & E\{(\mathbf{m}_5 + \mathbf{q}_3 + \mathbf{q}_4)(\mathbf{m}_5 + \mathbf{q}_3 + \mathbf{q}_4)^\top\} \end{pmatrix}$$

$$\mathbf{F}_{12}^{opt4}(\boldsymbol{\theta}) = \begin{pmatrix} \mathbf{J}_8(\boldsymbol{\theta})^\top & E\{\tilde{\varphi} \mathbf{m}_3^\top\} & E\{\tilde{\varphi}(\mathbf{m}_5 + \mathbf{q}_3 + \mathbf{q}_4)^\top\} \end{pmatrix}^\top.$$

Here we suppress the notations by writing  $\mathbf{m}_5 \equiv \mathbf{m}_5(\mathbf{U}_i, \boldsymbol{\theta}, g_0, h_0)$ ,  $\mathbf{q}_3 \equiv \mathbf{q}_3(\mathbf{U}_i, \boldsymbol{\theta}, g_0, h_0)$ ,  $\mathbf{q}_4 \equiv \mathbf{q}_4(\mathbf{U}_i, \boldsymbol{\theta}, g_0, h_0)$  where

$$\begin{aligned} \mathbf{m}_5(\mathbf{U}, \boldsymbol{\theta}, g_0, h_0) &= \mathbf{m}_4(\mathbf{U}, \boldsymbol{\theta}) - \left( \frac{[R - \pi\{d(\mathbf{X}), \mathbf{X}; \gamma\}][1 - \pi\{d(\mathbf{X}), \mathbf{X}; \gamma\}]}{\pi^2\{d(\mathbf{X}), \mathbf{X}; \gamma\}} \right. \\ &\quad \cdot \left[ Q_\beta\{\mathbf{X}, d(\mathbf{X}); \boldsymbol{\beta}\} + [\phi_1, \dots, \phi_q][\psi_1, \dots, \psi_q]^{-1} \frac{\pi_\gamma\{d(\mathbf{X}), \mathbf{X}; \gamma\}}{1 - \pi\{d(\mathbf{X}), \mathbf{X}; \gamma\}} \right] \\ &\quad \cdot \left[ g_0(\mathbf{X})I\{d(\mathbf{X}) = 1\} + h_0(\mathbf{X})I\{d(\mathbf{X}) = -1\} \right. \\ &\quad \left. \left. - Q\{\mathbf{X}, d(\mathbf{X}); \boldsymbol{\beta}\} - \boldsymbol{\alpha}^\top[\psi_1, \dots, \psi_q]^{-1} \frac{\pi_\gamma\{d(\mathbf{X}), \mathbf{X}; \gamma\}}{1 - \pi\{d(\mathbf{X}), \mathbf{X}; \gamma\}} \right] \right). \\ \mathbf{q}_3(\mathbf{U}_i, \boldsymbol{\theta}, g_0, h_0) &= -\{Y_i - g_0(\mathbf{X}_i)\} \frac{I(A_i = 1)f_{\mathbf{X}}(\mathbf{X}_i)}{f_{\mathbf{X},A}(\mathbf{X}_i, 1)} \cdot \frac{\pi_0\{d(\mathbf{X}_i), \mathbf{X}_i\} - \pi\{d(\mathbf{X}_i), \mathbf{X}_i; \gamma\}}{\pi\{d(\mathbf{X}_i), \mathbf{X}_i; \gamma\}} \\ &\quad \cdot \frac{1 - \pi\{d(\mathbf{X}_i), \mathbf{X}_i; \gamma\}}{\pi\{d(\mathbf{X}_i), \mathbf{X}_i; \gamma\}} \cdot I\{d(\mathbf{X}_i) = 1\} \\ &\quad \cdot \left[ Q_\beta\{\mathbf{X}_i, d(\mathbf{X}_i); \boldsymbol{\beta}\} + [\phi_1, \dots, \phi_q][\psi_1, \dots, \psi_q]^{-1} \frac{\pi_\gamma\{d(\mathbf{X}_i), \mathbf{X}_i; \gamma\}}{1 - \pi\{d(\mathbf{X}_i), \mathbf{X}_i; \gamma\}} \right], \\ \mathbf{q}_4(\mathbf{U}_i, \boldsymbol{\theta}, g_0, h_0) &= -\{Y_i - h_0(\mathbf{X}_i)\} \frac{I(A_i = -1)f_{\mathbf{X}}(\mathbf{X}_i)}{f_{\mathbf{X},A}(\mathbf{X}_i, -1)} \cdot \frac{\pi_0\{d(\mathbf{X}_i), \mathbf{X}_i\} - \pi\{d(\mathbf{X}_i), \mathbf{X}_i; \gamma\}}{\pi\{d(\mathbf{X}_i), \mathbf{X}_i; \gamma\}} \\ &\quad \cdot \frac{1 - \pi\{d(\mathbf{X}_i), \mathbf{X}_i; \gamma\}}{\pi\{d(\mathbf{X}_i), \mathbf{X}_i; \gamma\}} \cdot I\{d(\mathbf{X}_i) = -1\} \\ &\quad \cdot \left[ Q_\beta\{\mathbf{X}_i, d(\mathbf{X}_i); \boldsymbol{\beta}\} + [\phi_1, \dots, \phi_q][\psi_1, \dots, \psi_q]^{-1} \frac{\pi_\gamma\{d(\mathbf{X}_i), \mathbf{X}_i; \gamma\}}{1 - \pi\{d(\mathbf{X}_i), \mathbf{X}_i; \gamma\}} \right]. \end{aligned}$$

The true parameters are  $\boldsymbol{\theta}_0^{opt4} = (\boldsymbol{\gamma}^{*\top}, \boldsymbol{\zeta}_{opt4}^{*\top}, \boldsymbol{\beta}_{opt4}^{*\top}, V(d))^\top$  where  $(\boldsymbol{\zeta}_{opt4}^*, \boldsymbol{\beta}_{opt4}^*)$  is the solution to the following set of equations:

$$\begin{aligned} \boldsymbol{\alpha} + E \{ \partial \tilde{\varphi}(Y, A, \mathbf{X}, \boldsymbol{\gamma}^*, \boldsymbol{\beta}) / \partial \boldsymbol{\gamma} \} &= \mathbf{0}, \\ [\boldsymbol{\psi}_1, \dots, \boldsymbol{\psi}_q] - E \{ S_\gamma(A, \mathbf{X}, \boldsymbol{\gamma}^*) S_\gamma^\top(A, \mathbf{X}, \boldsymbol{\gamma}^*) \} &= \mathbf{0}, \\ [\boldsymbol{\phi}_1, \dots, \boldsymbol{\phi}_q] + E \{ \partial^2 \tilde{\varphi}(Y, A, \mathbf{X}, \boldsymbol{\gamma}^*, \boldsymbol{\beta}) / \partial \boldsymbol{\gamma}^\top \partial \boldsymbol{\beta} \} &= \mathbf{0}, \\ (***) - E \left( \frac{[R - \pi\{d(\mathbf{X}), \mathbf{X}; \boldsymbol{\gamma}^*\}][1 - \pi\{d(\mathbf{X}), \mathbf{X}; \boldsymbol{\gamma}^*\}]}{\pi^2\{d(\mathbf{X}), \mathbf{X}; \boldsymbol{\gamma}^*\}} \right. \\ &\cdot \left[ Q_\beta\{\mathbf{X}, d(\mathbf{X}); \boldsymbol{\beta}\} + [\boldsymbol{\phi}_1, \dots, \boldsymbol{\phi}_q][\boldsymbol{\psi}_1, \dots, \boldsymbol{\psi}_q]^{-1} \frac{\pi_\gamma\{d(\mathbf{X}), \mathbf{X}; \boldsymbol{\gamma}^*\}}{1 - \pi\{d(\mathbf{X}), \mathbf{X}; \boldsymbol{\gamma}^*\}} \right] \\ &\cdot \left. \left[ Q_0\{\mathbf{X}, d(\mathbf{X})\} - Q\{\mathbf{X}, d(\mathbf{X}); \boldsymbol{\beta}\} - \boldsymbol{\alpha}^\top [\boldsymbol{\psi}_1, \dots, \boldsymbol{\psi}_q]^{-1} \frac{\pi_\gamma\{d(\mathbf{X}), \mathbf{X}; \boldsymbol{\gamma}^*\}}{1 - \pi\{d(\mathbf{X}), \mathbf{X}; \boldsymbol{\gamma}^*\}} \right] \right) = \mathbf{0}, \end{aligned}$$

where (\*\*\*) is the left hand side of (S.11).

**Remark 2.** When  $\pi(A, \mathbf{X}; \boldsymbol{\gamma})$  is correctly specified, i.e.  $\pi(A, \mathbf{X}; \boldsymbol{\gamma}_0) = \pi_0(A, \mathbf{X})$  for some  $\boldsymbol{\gamma}_0$ , it is obvious that  $\boldsymbol{\gamma}^* = \boldsymbol{\gamma}_0$ . Observe that  $\mathbf{J}_4(\boldsymbol{\theta}) = \mathbf{0}_{1 \times s}$  for any  $\boldsymbol{\theta}$ . Hence,

$$\mathbf{D}_2^{opt3}(\boldsymbol{\theta}) = \mathbf{D}_2^{opt4}(\boldsymbol{\theta}) = \begin{pmatrix} \mathbf{J}_3(\boldsymbol{\theta}) & \mathbf{0}_{1 \times r} & \mathbf{0}_{1 \times s} \end{pmatrix}.$$

By some algebra, it can be shown that in this case,

$$U_4(\boldsymbol{\theta}) = U_5(\boldsymbol{\theta}) = U_6(\boldsymbol{\theta}) = \mathbf{J}_3(\boldsymbol{\theta}) \mathbf{J}_1^{-1}(\boldsymbol{\theta}) \mathbf{J}_5(\boldsymbol{\theta}) \mathbf{J}_1^{-1}(\boldsymbol{\theta}) \mathbf{J}_3^\top(\boldsymbol{\theta}) - 2\mathbf{J}_3(\boldsymbol{\theta}) \mathbf{J}_1^{-1}(\boldsymbol{\theta}) \mathbf{J}_8(\boldsymbol{\theta}) + \mathbf{F}_{22}(\boldsymbol{\theta}).$$

In a slight abuse of notation, it is easy to show that  $\boldsymbol{\beta}_{opt3}^* = \boldsymbol{\beta}_{opt4}^* = \boldsymbol{\beta}^{opt}$  where  $\boldsymbol{\beta}^{opt}$  satisfies

$$\begin{aligned} E \left( \frac{1 - \pi_0\{d(\mathbf{X}), \mathbf{X}\}}{\pi_0\{d(\mathbf{X}), \mathbf{X}\}} \left[ Q_\beta\{\mathbf{X}, d(\mathbf{X}); \boldsymbol{\beta}^{opt}\} + \Phi_0(\boldsymbol{\beta}^{opt}) \Sigma_{\boldsymbol{\gamma}\boldsymbol{\gamma}, 0}^{-1} \cdot \frac{\pi_\gamma\{d(\mathbf{X}), \mathbf{X}; \boldsymbol{\gamma}_0\}}{1 - \pi_0\{d(\mathbf{X}), \mathbf{X}\}} \right] \right. \\ \cdot \left. \left[ Q_0\{\mathbf{X}, d(\mathbf{X})\} - Q\{\mathbf{X}, d(\mathbf{X}); \boldsymbol{\beta}^{opt}\} - \Gamma_0(\boldsymbol{\beta}^{opt}) \Sigma_{\boldsymbol{\gamma}\boldsymbol{\gamma}, 0}^{-1} \cdot \frac{\pi_\gamma\{d(\mathbf{X}), \mathbf{X}; \boldsymbol{\gamma}_0\}}{1 - \pi_0\{d(\mathbf{X}), \mathbf{X}\}} \right] \right) = \mathbf{0}. \end{aligned}$$

In addition, note that

$$\begin{aligned}\mathbf{J}_1(\boldsymbol{\theta}_0^{LS2}) &= \mathbf{J}_1(\boldsymbol{\theta}_0^{opt3}) = \mathbf{J}_1(\boldsymbol{\theta}_0^{opt4}) = E\{S_{\gamma\gamma}(A, \mathbf{X}; \gamma_0)\} = -E\{S_{\gamma}(A, \mathbf{X}; \gamma_0)S_{\gamma}^{\top}(A, \mathbf{X}; \gamma_0)\} = -\Sigma_{\gamma\gamma,0} \\ \mathbf{J}_3(\boldsymbol{\theta}_0^{LS2}) &= E\{\partial\tilde{\varphi}(Y, A, \mathbf{X}, \gamma_0, \boldsymbol{\beta}_{LS}^*)/\partial\boldsymbol{\gamma}^{\top}\} = -\Gamma_0(\boldsymbol{\beta}_{LS}^*), \quad \mathbf{J}_3(\boldsymbol{\theta}_0^{opt3}) = \mathbf{J}_3(\boldsymbol{\theta}_0^{opt4}) = -\Gamma_0(\boldsymbol{\beta}^{opt}), \\ \mathbf{J}_5(\boldsymbol{\theta}_0^{LS2}) &= \mathbf{J}_5(\boldsymbol{\theta}_0^{opt3}) = \mathbf{J}_5(\boldsymbol{\theta}_0^{opt4}) = \Sigma_{\gamma\gamma,0}.\end{aligned}$$

Hence, the asymptotic variance of  $\widehat{V}(d; \hat{\gamma}, \hat{\boldsymbol{\beta}}^{LS})$  is

$$\begin{aligned}& \Gamma_0(\boldsymbol{\beta}_{LS}^*)\Sigma_{\gamma\gamma,0}^{-1}\Gamma_0^{\top}(\boldsymbol{\beta}_{LS}^*) - 2\Gamma_0(\boldsymbol{\beta}_{LS}^*)\Sigma_{\gamma\gamma,0}^{-1}E\{S_{\gamma}(A, \mathbf{X}; \gamma_0)\tilde{\varphi}(Y, A, \mathbf{X}, \gamma_0, \boldsymbol{\beta}_{LS}^*)\} + E\tilde{\varphi}^2(Y, A, \mathbf{X}, \gamma_0, \boldsymbol{\beta}_{LS}^*) \\ &= E\{\tilde{\varphi}(Y, A, \mathbf{X}, \gamma_0, \boldsymbol{\beta}_{LS}^*) - \Gamma_0(\boldsymbol{\beta}_{LS}^*)\Sigma_{\gamma\gamma,0}^{-1}S_{\gamma}(A, \mathbf{X}; \gamma_0)\}^2\end{aligned}$$

The asymptotic variance is the same for  $\widehat{V}(d; \hat{\gamma}, \hat{\boldsymbol{\beta}}^{opt3})$  and  $\widehat{V}(d; \hat{\gamma}, \hat{\boldsymbol{\beta}}^{opt4})$ , which equals to

$$E\{\tilde{\varphi}(Y, A, \mathbf{X}, \gamma_0, \boldsymbol{\beta}^{opt}) - \Gamma_0(\boldsymbol{\beta}^{opt})\Sigma_{\gamma\gamma,0}^{-1}S_{\gamma}(A, \mathbf{X}; \gamma_0)\}^2.$$

The above two quantities are the variance of the influence function ( $\mathcal{I}$ ) evaluated at different  $\boldsymbol{\beta}$  values. By definition of  $\boldsymbol{\beta}^{opt}$ , when the propensity score is correct but outcome model incorrect,  $\widehat{V}(d; \hat{\gamma}, \hat{\boldsymbol{\beta}}^{opt3})$  and  $\widehat{V}(d; \hat{\gamma}, \hat{\boldsymbol{\beta}}^{opt4})$  have the same asymptotic variance, which is smaller than that of  $\widehat{V}(d; \hat{\gamma}, \hat{\boldsymbol{\beta}}^{LS})$ . Though, in small sample size,  $\widehat{V}(d; \hat{\gamma}, \hat{\boldsymbol{\beta}}^{opt4})$  is preferred since it produces much more stable estimates. When both models are correct, note that  $\boldsymbol{\beta}^{opt} = \boldsymbol{\beta}_0 = \boldsymbol{\beta}_{LS}^*$ , all estimators are asymptotically equivalent.

*Proof.* For the usual DR estimator  $\widehat{V}(d; \hat{\gamma}, \hat{\boldsymbol{\beta}}^{LS})$ , the parameters are  $\boldsymbol{\theta} = (\boldsymbol{\gamma}^{\top}, \boldsymbol{\beta}^{\top}, V(d))^{\top}$  and the estimating equation is given by

$$\mathbf{m}(\mathbf{U}_i, \boldsymbol{\theta}) = \begin{pmatrix} S_{\gamma}(A_i, \mathbf{X}_i; \boldsymbol{\gamma}) \\ Q_{\boldsymbol{\beta}}(\mathbf{X}_i, A_i; \boldsymbol{\beta}) \{Y_i - Q(\mathbf{X}_i, A_i; \boldsymbol{\beta})\} \\ \frac{I\{A_i = d(\mathbf{X}_i)\}}{\pi\{d(\mathbf{X}_i), \mathbf{X}_i; \boldsymbol{\gamma}\}} [Y_i - Q\{\mathbf{X}_i, d(\mathbf{X}_i); \boldsymbol{\beta}\}] + Q\{\mathbf{X}_i, d(\mathbf{X}_i); \boldsymbol{\beta}\} - V(d) \end{pmatrix}.$$



When at least one model is correct,  $\boldsymbol{\theta}_0^{\text{LS2}} = (\boldsymbol{\gamma}^{*\top}, \boldsymbol{\beta}_{\text{LS}}^{*\top}, V(d))^\top$  where  $\boldsymbol{\gamma}^*$  satisfies  $E\{S_\gamma(A, \mathbf{X}; \boldsymbol{\gamma}^*)\} = \mathbf{0}$  and  $\boldsymbol{\beta}_{\text{LS}}^*$  satisfies  $E[Q_\beta(\mathbf{X}, A; \boldsymbol{\beta}_{\text{LS}}^*)\{Y - Q(\mathbf{X}, A; \boldsymbol{\beta}_{\text{LS}}^*)\}] = \mathbf{0}$ . By M-estimation theory,  $\hat{\boldsymbol{\theta}}^{\text{LS2}} \triangleq (\hat{\boldsymbol{\gamma}}^\top, \{\hat{\boldsymbol{\beta}}^{\text{LS}}\}^\top, \widehat{V}(d; \hat{\boldsymbol{\gamma}}, \hat{\boldsymbol{\beta}}^{\text{LS}}))^\top$  is asymptotically normal,

$$\sqrt{n}(\hat{\boldsymbol{\theta}}^{\text{LS2}} - \boldsymbol{\theta}_0^{\text{LS2}}) \xrightarrow{D} N(0, \{\mathbf{D}^{\text{LS2}}(\boldsymbol{\theta}_0^{\text{LS2}})\}^{-1} \mathbf{F}^{\text{LS2}}(\boldsymbol{\theta}_0^{\text{LS2}}) [\{\mathbf{D}^{\text{LS2}}(\boldsymbol{\theta}_0^{\text{LS2}})\}^{-1}]^\top),$$

where

$$\mathbf{D}^{\text{LS2}}(\boldsymbol{\theta}) = \begin{pmatrix} \mathbf{D}_1^{\text{LS2}}(\boldsymbol{\theta}) & \mathbf{0}_{(s+q) \times 1} \\ \mathbf{D}_2^{\text{LS2}}(\boldsymbol{\theta}) & -1 \end{pmatrix}, \quad \mathbf{F}^{\text{LS2}}(\boldsymbol{\theta}) = \begin{pmatrix} \mathbf{F}_{11}^{\text{LS2}}(\boldsymbol{\theta}) & \mathbf{F}_{12}^{\text{LS2}}(\boldsymbol{\theta}) \\ \{\mathbf{F}_{12}^{\text{LS2}}(\boldsymbol{\theta})\}^\top & \mathbf{F}_{22}(\boldsymbol{\theta}) \end{pmatrix},$$

with all the quantities defined in the Theorem. The rest is by some algebra.

For  $\widehat{V}(d; \hat{\boldsymbol{\gamma}}, \hat{\boldsymbol{\beta}}^{\text{opt3}})$ , the unknown parameters are  $\boldsymbol{\theta} = (\boldsymbol{\gamma}^\top, \boldsymbol{\zeta}^\top, \boldsymbol{\beta}^\top, V(d))^\top$ . The estimating equation is

$$\mathbf{m}^{\text{opt3}}(\mathbf{U}_i, \boldsymbol{\theta}) = \begin{pmatrix} S_\gamma(A_i, \mathbf{X}_i; \boldsymbol{\gamma}) \\ \mathbf{m}_3(\mathbf{U}_i, \boldsymbol{\theta}) \\ \mathbf{m}_4(\mathbf{U}_i, \boldsymbol{\theta}) \\ \tilde{\varphi}(Y_i, A_i, \mathbf{X}_i, \boldsymbol{\gamma}, \boldsymbol{\beta}) \end{pmatrix},$$

where  $\mathbf{m}_3(\mathbf{U}_i, \boldsymbol{\theta})$ ,  $\mathbf{m}_4(\mathbf{U}_i, \boldsymbol{\theta})$  are defined in the Theorem. By M-estimation theory,

$$\sqrt{n}(\hat{\boldsymbol{\theta}}^{\text{opt3}} - \boldsymbol{\theta}_0^{\text{opt3}}) \xrightarrow{D} N(0, \{\mathbf{D}^{\text{opt3}}(\boldsymbol{\theta}_0^{\text{opt3}})\}^{-1} \mathbf{F}^{\text{opt3}}(\boldsymbol{\theta}_0^{\text{opt3}}) [\{\mathbf{D}^{\text{opt3}}(\boldsymbol{\theta}_0^{\text{opt3}})\}^{-1}]^\top),$$

where

$$\mathbf{D}^{\text{opt3}}(\boldsymbol{\theta}) = E\{\partial \mathbf{m}^{\text{opt3}}(\mathbf{U}_i, \boldsymbol{\theta}) / \partial \boldsymbol{\theta}^\top\} = \begin{pmatrix} \mathbf{D}_1^{\text{opt3}}(\boldsymbol{\theta}) & \mathbf{0}_{(q+r+s) \times 1} \\ \mathbf{D}_2^{\text{opt3}}(\boldsymbol{\theta}) & -1 \end{pmatrix},$$

$$\mathbf{F}^{\text{opt3}}(\boldsymbol{\theta}) = E\{\mathbf{m}^{\text{opt3}}(\mathbf{U}_i, \boldsymbol{\theta}) \mathbf{m}^{\text{opt3}}(\mathbf{U}_i, \boldsymbol{\theta})^\top\} = \begin{pmatrix} \mathbf{F}_{11}^{\text{opt3}}(\boldsymbol{\theta}) & \mathbf{F}_{12}^{\text{opt3}}(\boldsymbol{\theta}) \\ \{\mathbf{F}_{12}^{\text{opt3}}(\boldsymbol{\theta})\}^\top & \mathbf{F}_{22}(\boldsymbol{\theta}) \end{pmatrix},$$

with all the quantities defined in the Theorem. The rest is by some algebra.

For  $\widehat{V}(d; \hat{\boldsymbol{\gamma}}, \hat{\boldsymbol{\beta}}^{\text{opt4}})$ , the unknown parameters are  $\boldsymbol{\theta} = (\boldsymbol{\gamma}^\top, \boldsymbol{\zeta}^\top, \boldsymbol{\beta}^\top, V(d))^\top$ . The estimating equation is

$$\mathbf{m}^{\text{opt4}}(\mathbf{U}_i, \boldsymbol{\theta}, g, h) = \begin{pmatrix} S_\gamma(A_i, \mathbf{X}_i; \boldsymbol{\gamma}) \\ \mathbf{m}_3(\mathbf{U}_i, \boldsymbol{\theta}) \\ \mathbf{m}_5(\mathbf{U}_i, \boldsymbol{\theta}, g, h) \\ \tilde{\varphi}(Y_i, A_i, \mathbf{X}_i, \boldsymbol{\gamma}, \boldsymbol{\beta}) \end{pmatrix},$$

where  $\mathbf{m}_5(\mathbf{U}_i, \boldsymbol{\theta}, g, h)$  is defined in the Theorem. Let us define  $\mathbf{M}^{\text{opt4}}(\boldsymbol{\theta}, g, h) = E \{ \mathbf{m}^{\text{opt4}}(\mathbf{U}_i, \boldsymbol{\theta}, g, h) \}$  and  $\mathbf{M}_n^{\text{opt4}}(\boldsymbol{\theta}, g, h) = n^{-1} \sum_{i=1}^n \mathbf{m}^{\text{opt4}}(\mathbf{U}_i, \boldsymbol{\theta}, g, h)$ . Now we calculate the ordinary and functional derivatives in Theorem S1. The ordinary derivative of  $\mathbf{M}^{\text{opt4}}(\boldsymbol{\theta}, g_0, h_0)$  with respect to  $\boldsymbol{\theta}$  is

$$\boldsymbol{\Gamma}_1^{\text{opt4}}(\boldsymbol{\theta}, g_0, h_0) = \begin{pmatrix} \mathbf{D}_1^{\text{opt4}}(\boldsymbol{\theta}) & \mathbf{0}_{(q+r+s) \times 1} \\ \mathbf{D}_2^{\text{opt4}}(\boldsymbol{\theta}) & -1 \end{pmatrix}.$$

In addition,

$$\boldsymbol{\Gamma}_2^{\text{opt4}}(\boldsymbol{\theta}, g, h)[\bar{g} - g] = \begin{pmatrix} \mathbf{0}_{1 \times q} \\ \mathbf{0}_{1 \times r} \\ \boldsymbol{\Gamma}_{21}^{\text{opt4}}(\boldsymbol{\theta}, g, h)[\bar{g} - g] \\ 0 \end{pmatrix} \quad \boldsymbol{\Gamma}_3^{\text{opt4}}(\boldsymbol{\theta}, g, h)[\bar{h} - h] = \begin{pmatrix} \mathbf{0}_{1 \times q} \\ \mathbf{0}_{1 \times r} \\ \boldsymbol{\Gamma}_{31}^{\text{opt4}}(\boldsymbol{\theta}, g, h)[\bar{h} - h] \\ 0 \end{pmatrix}$$

where

$$\begin{aligned} \boldsymbol{\Gamma}_{21}^{\text{opt4}}(\boldsymbol{\theta}, g, h)[\bar{g} - g] &= E \left( - \{ \bar{g}(\mathbf{X}) - g(\mathbf{X}) \} I \{ d(\mathbf{X}) = 1 \} \frac{[R - \pi \{ d(\mathbf{X}), \mathbf{X}; \boldsymbol{\gamma} \}] [1 - \pi \{ d(\mathbf{X}), \mathbf{X}; \boldsymbol{\gamma} \}]}{\pi^2 \{ d(\mathbf{X}), \mathbf{X}; \boldsymbol{\gamma} \}} \right. \\ &\quad \cdot \left. \left[ Q_{\boldsymbol{\beta}} \{ \mathbf{X}, d(\mathbf{X}); \boldsymbol{\beta} \} + [\boldsymbol{\phi}_1, \dots, \boldsymbol{\phi}_q][\boldsymbol{\psi}_1, \dots, \boldsymbol{\psi}_q]^{-1} \frac{\pi_\gamma \{ d(\mathbf{X}), \mathbf{X}; \boldsymbol{\gamma} \}}{1 - \pi \{ d(\mathbf{X}), \mathbf{X}; \boldsymbol{\gamma} \}} \right] \right), \\ \boldsymbol{\Gamma}_{31}^{\text{opt4}}(\boldsymbol{\theta}, g, h)[\bar{h} - h] &= E \left( - \{ \bar{h}(\mathbf{X}) - h(\mathbf{X}) \} I \{ d(\mathbf{X}) = -1 \} \frac{[R - \pi \{ d(\mathbf{X}), \mathbf{X}; \boldsymbol{\gamma} \}] [1 - \pi \{ d(\mathbf{X}), \mathbf{X}; \boldsymbol{\gamma} \}]}{\pi^2 \{ d(\mathbf{X}), \mathbf{X}; \boldsymbol{\gamma} \}} \right. \\ &\quad \cdot \left. \left[ Q_{\boldsymbol{\beta}} \{ \mathbf{X}, d(\mathbf{X}); \boldsymbol{\beta} \} + [\boldsymbol{\phi}_1, \dots, \boldsymbol{\phi}_q][\boldsymbol{\psi}_1, \dots, \boldsymbol{\psi}_q]^{-1} \frac{\pi_\gamma \{ d(\mathbf{X}), \mathbf{X}; \boldsymbol{\gamma} \}}{1 - \pi \{ d(\mathbf{X}), \mathbf{X}; \boldsymbol{\gamma} \}} \right] \right). \end{aligned}$$

Using similar arguments, we have

$$\begin{aligned}\Gamma_{21}^{\text{opt4}}(\boldsymbol{\theta}, g_0, h_0)[\hat{g} - g_0] &= \frac{1}{n} \sum_{i=1}^n \mathbf{q}_3(\mathbf{U}_i, \boldsymbol{\theta}, g_0, h_0) + o_p(n^{-1/2}) \\ \Gamma_{31}^{\text{opt4}}(\boldsymbol{\theta}, g_0, h_0)[\hat{h} - h_0] &= \frac{1}{n} \sum_{i=1}^n \mathbf{q}_4(\mathbf{U}_i, \boldsymbol{\theta}, g_0, h_0) + o_p(n^{-1/2})\end{aligned}$$

where  $\mathbf{q}_3$  and  $\mathbf{q}_4$  are defined previously. Combining the above results, we have

$$\sqrt{n} \left\{ \mathbf{M}_n^{\text{opt4}}(\boldsymbol{\theta}, g_0, h_0) + \Gamma_2^{\text{opt4}}(\boldsymbol{\theta}, g_0, h_0)[\hat{g} - g_0] + \Gamma_3^{\text{opt4}}(\boldsymbol{\theta}, g_0, h_0)[\hat{h} - h_0] \right\} \xrightarrow{D} N(\mathbf{0}, \mathbf{F}^{\text{opt4}}(\boldsymbol{\theta})),$$

where

$$\mathbf{F}^{\text{opt4}}(\boldsymbol{\theta}) = \begin{pmatrix} \mathbf{F}_{11}^{\text{opt4}}(\boldsymbol{\theta}) & \mathbf{F}_{12}^{\text{opt4}}(\boldsymbol{\theta}) \\ \{\mathbf{F}_{12}^{\text{opt4}}(\boldsymbol{\theta})\}^\top & \mathbf{F}_{22}(\boldsymbol{\theta}) \end{pmatrix},$$

Based on Theorem S1,

$$\sqrt{n}(\hat{\boldsymbol{\theta}}^{\text{opt4}} - \boldsymbol{\theta}_0^{\text{opt4}}) \xrightarrow{D} N(0, \boldsymbol{\Omega}^{\text{opt4}}(\boldsymbol{\theta}_0^{\text{opt4}})),$$

where  $\boldsymbol{\Omega}^{\text{opt4}}(\boldsymbol{\theta}) = \Gamma_1^{\text{opt4}}(\boldsymbol{\theta}, g_0, h_0)^{-1} \mathbf{F}^{\text{opt4}}(\boldsymbol{\theta}) \{\Gamma_1^{\text{opt4}}(\boldsymbol{\theta}, g_0, h_0)^{-1}\}^\top$ . The rest of the proof follows by some simple algebra.  $\square$

## Appendix E: Additional simulation results

Simulation results for Scenario 1 when  $n = 100$  or  $500$  are shown in Figure S1. Simulation results for Scenario 2 when  $n = 100$  or  $500$  are shown in Figure S2. We draw the same conclusions as in the main paper, our proposed method Aug-Improved-DR outperformed other competing methods evidenced by larger value functions and smaller variance in value functions. Table S1 and S2 displays the MSE of different methods in terms of estimating  $\boldsymbol{\eta}$ . Again, Aug-Improved-DR has superior performance evidenced by smaller MSE.

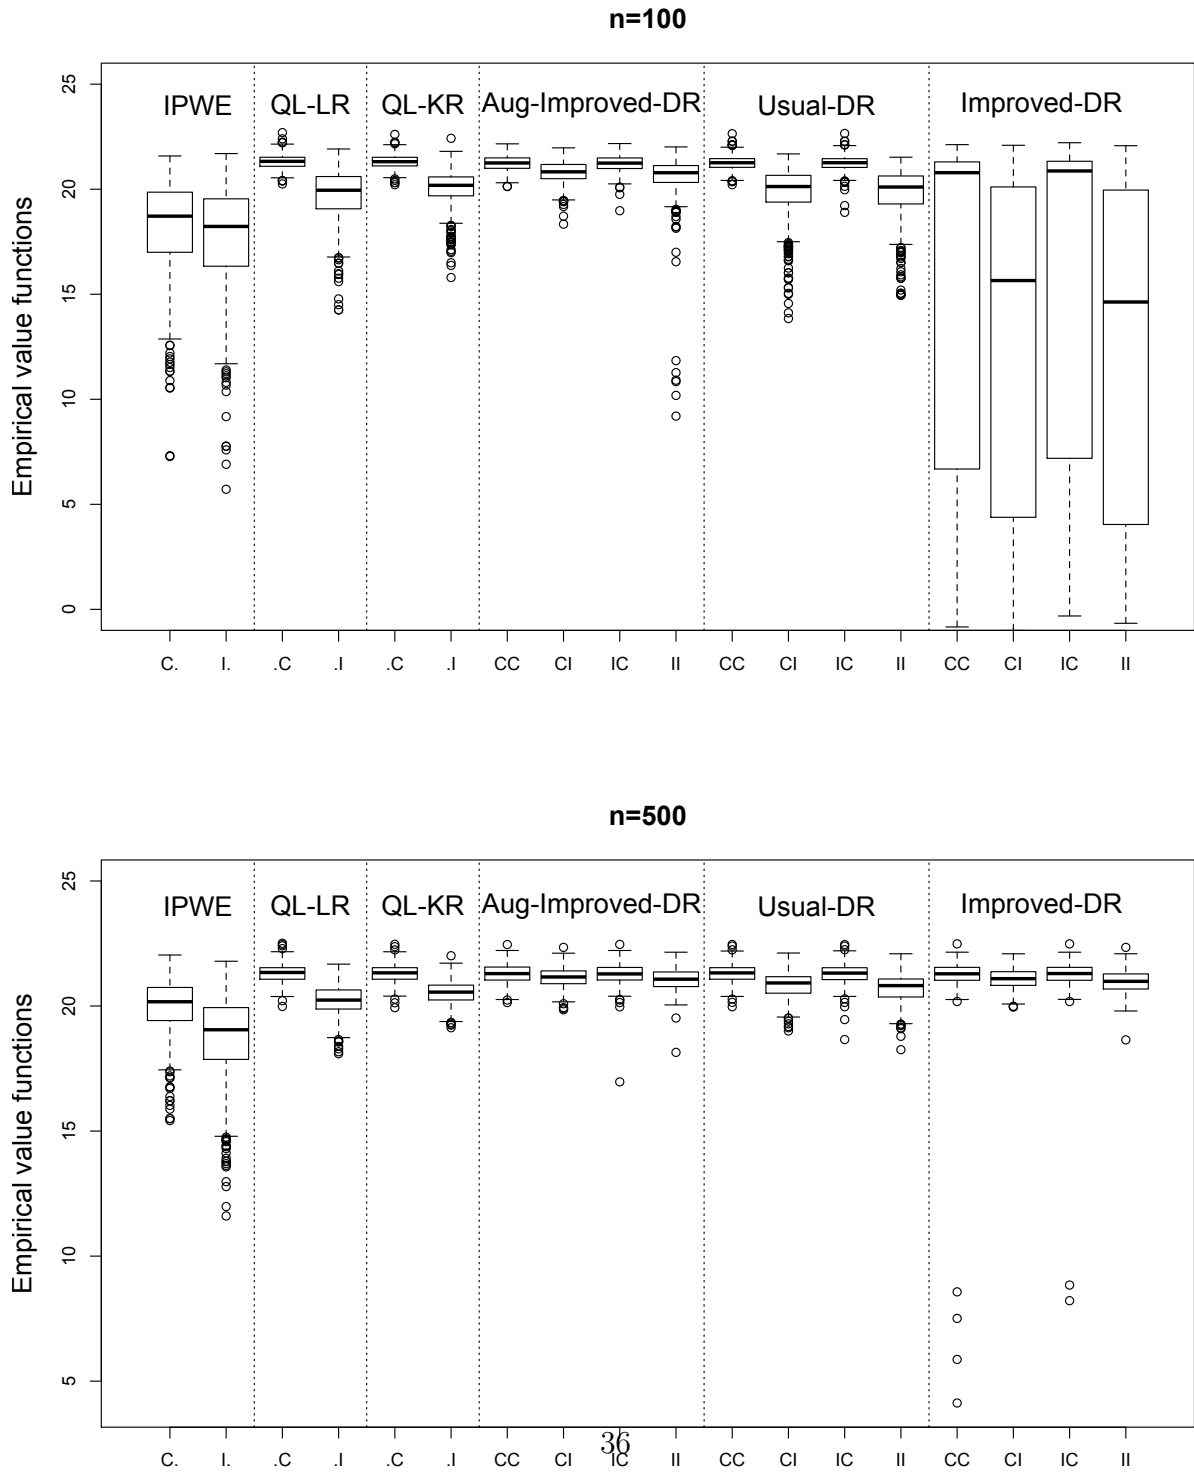

Figure S1: Simulation results for Scenario 1. Value functions over 500 replications. The optimal value is  $E\{Y(d^{\text{opt}})\} = 21.32$ .

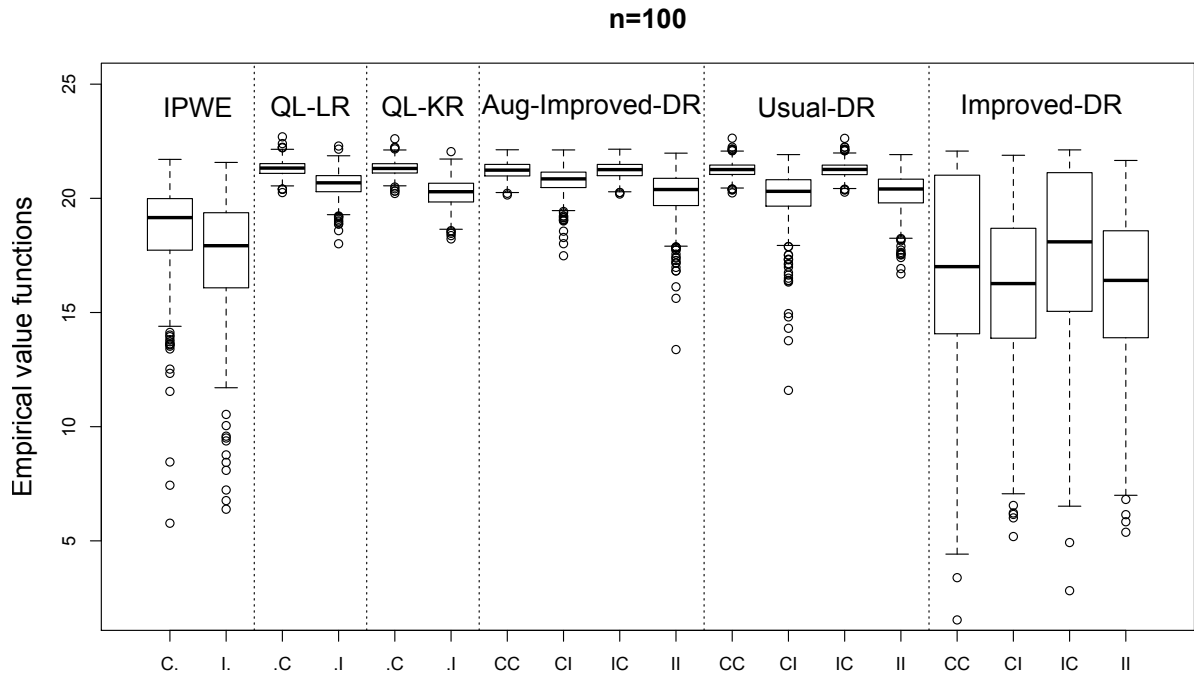

Figure S2: Simulation results for Scenario 2. Value functions over 500 replications. The optimal value is  $E\{Y(d^{\text{opt}})\} = 21.32$ .

## References

- Chen, X., Linton, O., and Van Keilegom, I. (2003). Estimation of semiparametric models when the criterion function is not smooth. *Econometrica*, 71(5):1591–1608.
- Ichimura, H. and Lee, S. (2010). Characterization of the asymptotic distribution of semiparametric M-estimators. *Journal of Econometrics*, 159(2):252–266.
- Pakes, A. and Pollard, D. (1989). Simulation and the asymptotics of optimization estimators. *Econometrica*, 57(5):1027–1057.
- Racine, J. and Li, Q. (2004). Nonparametric estimation of regression functions with both categorical and continuous data. *Journal of Econometrics*, 119(1):99–130.
- Stefanski, L. A. and Boos, D. D. (2002). The calculus of M-estimation. *The American Statistician*, 56(1):29–38.

Table S1: Simulation results for Scenario 1. Root MSE for estimating  $\boldsymbol{\eta}$ . By imposing  $\|\boldsymbol{\eta}\| = 1$ ,  $d^{\text{opt}}$  corresponds to  $(\eta_0, \eta_1, \eta_2, \eta_3, \eta_4) = (-0.07, -0.71, 0.71, 0, 0)$ .

|                 | $\eta_0$                 | $\eta_1$ | $\eta_2$ | $\eta_3$ | $\eta_4$ | $\eta_0$                    | $\eta_1$    | $\eta_2$    | $\eta_3$    | $\eta_4$    |
|-----------------|--------------------------|----------|----------|----------|----------|-----------------------------|-------------|-------------|-------------|-------------|
| $n = 250$       |                          |          |          |          |          |                             |             |             |             |             |
|                 | CC: both models correct  |          |          |          |          | CI: only propensity correct |             |             |             |             |
| IPWE            | 0.22                     | 0.31     | 0.17     | 0.29     | 0.30     |                             |             |             |             |             |
| Usual-DR        | 0.03                     | 0.02     | 0.02     | 0.03     | 0.03     | 0.15                        | 0.17        | 0.11        | 0.22        | 0.18        |
| Improved-DR     | 0.15                     | 0.22     | 0.18     | 0.06     | 0.07     | 0.14                        | 0.18        | 0.15        | 0.14        | 0.16        |
| Aug-Improved-DR | 0.03                     | 0.02     | 0.02     | 0.03     | 0.03     | <b>0.10</b>                 | <b>0.07</b> | <b>0.07</b> | <b>0.11</b> | <b>0.11</b> |
|                 | IC: only outcome correct |          |          |          |          | II: both models incorrect   |             |             |             |             |
| IPWE            | 0.30                     | 0.52     | 0.14     | 0.27     | 0.28     |                             |             |             |             |             |
| Usual-DR        | 0.03                     | 0.03     | 0.03     | 0.03     | 0.03     | 0.23                        | 0.17        | 0.10        | 0.18        | 0.15        |
| Improved-DR     | 0.16                     | 0.21     | 0.16     | 0.07     | 0.06     | 0.16                        | 0.21        | 0.16        | 0.16        | 0.19        |
| Aug-Improved-DR | 0.03                     | 0.03     | 0.03     | 0.03     | 0.03     | 0.11                        | 0.08        | 0.08        | 0.12        | 0.13        |
| $n = 1000$      |                          |          |          |          |          |                             |             |             |             |             |
|                 | CC: both models correct  |          |          |          |          | CI: only propensity correct |             |             |             |             |
| IPWE            | 0.14                     | 0.18     | 0.11     | 0.20     | 0.20     |                             |             |             |             |             |
| Usual-DR        | 0.02                     | 0.01     | 0.01     | 0.02     | 0.02     | 0.08                        | 0.08        | 0.07        | 0.12        | 0.09        |
| Improved-DR     | 0.04                     | 0.06     | 0.03     | 0.02     | 0.02     | 0.06                        | 0.05        | 0.05        | 0.07        | 0.07        |
| Aug-Improved-DR | 0.02                     | 0.01     | 0.01     | 0.02     | 0.02     | <b>0.06</b>                 | <b>0.04</b> | <b>0.04</b> | <b>0.07</b> | <b>0.06</b> |
|                 | IC: only outcome correct |          |          |          |          | II: both models incorrect   |             |             |             |             |
| IPWE            | 0.23                     | 0.53     | 0.17     | 0.21     | 0.22     |                             |             |             |             |             |
| Usual-DR        | 0.02                     | 0.03     | 0.02     | 0.02     | 0.02     | 0.19                        | 0.11        | 0.07        | 0.12        | 0.09        |
| Improved-DR     | 0.02                     | 0.01     | 0.01     | 0.02     | 0.02     | 0.08                        | 0.07        | 0.06        | 0.09        | 0.09        |
| Aug-Improved-DR | 0.03                     | 0.03     | 0.02     | 0.03     | 0.03     | 0.08                        | 0.08        | 0.06        | 0.09        | 0.09        |

Table S2: Simulation results for Scenario 2. Root MSE for estimating  $\boldsymbol{\eta}$ . By imposing  $\|\boldsymbol{\eta}\| = 1$ ,  $d^{\text{opt}}$  corresponds to  $(\eta_0, \eta_1, \eta_2, \eta_3, \eta_4) = (-0.07, -0.71, 0.71, 0, 0)$ .

|                 | $\eta_0$                 | $\eta_1$ | $\eta_2$ | $\eta_3$ | $\eta_4$ | $\eta_0$                    | $\eta_1$    | $\eta_2$    | $\eta_3$    | $\eta_4$    |
|-----------------|--------------------------|----------|----------|----------|----------|-----------------------------|-------------|-------------|-------------|-------------|
| $n = 250$       |                          |          |          |          |          |                             |             |             |             |             |
|                 | CC: both models correct  |          |          |          |          | CI: only propensity correct |             |             |             |             |
| IPWE            | 0.21                     | 0.22     | 0.18     | 0.26     | 0.28     |                             |             |             |             |             |
| Usual-DR        | 0.03                     | 0.02     | 0.02     | 0.03     | 0.03     | 0.16                        | 0.14        | 0.11        | 0.19        | 0.17        |
| Improved-DR     | 0.16                     | 0.09     | 0.15     | 0.06     | 0.06     | 0.24                        | 0.12        | 0.21        | 0.15        | 0.13        |
| Aug-Improved-DR | 0.03                     | 0.02     | 0.02     | 0.03     | 0.03     | <b>0.09</b>                 | <b>0.07</b> | <b>0.06</b> | <b>0.11</b> | <b>0.10</b> |
|                 | IC: only outcome correct |          |          |          |          | II: both models incorrect   |             |             |             |             |
| IPWE            | 0.43                     | 0.30     | 0.16     | 0.27     | 0.28     |                             |             |             |             |             |
| Usual-DR        | 0.03                     | 0.02     | 0.02     | 0.03     | 0.03     | 0.16                        | 0.08        | 0.11        | 0.18        | 0.14        |
| Improved-DR     | 0.15                     | 0.09     | 0.15     | 0.07     | 0.05     | 0.29                        | 0.18        | 0.24        | 0.20        | 0.19        |
| Aug-Improved-DR | 0.03                     | 0.02     | 0.02     | 0.03     | 0.03     | 0.16                        | 0.15        | 0.10        | 0.18        | 0.17        |
| $n = 1000$      |                          |          |          |          |          |                             |             |             |             |             |
|                 | CC: both models correct  |          |          |          |          | CI: only propensity correct |             |             |             |             |
| IPWE            | 0.14                     | 0.14     | 0.12     | 0.17     | 0.16     |                             |             |             |             |             |
| Usual-DR        | 0.02                     | 0.01     | 0.01     | 0.02     | 0.02     | 0.09                        | 0.08        | 0.06        | 0.12        | 0.10        |
| Improved-DR     | 0.02                     | 0.01     | 0.01     | 0.02     | 0.02     | 0.04                        | 0.03        | 0.03        | 0.05        | 0.04        |
| Aug-Improved-DR | 0.02                     | 0.01     | 0.01     | 0.02     | 0.02     | <b>0.04</b>                 | <b>0.03</b> | <b>0.03</b> | <b>0.05</b> | <b>0.04</b> |
|                 | IC: only outcome correct |          |          |          |          | II: both models incorrect   |             |             |             |             |
| IPWE            | 0.45                     | 0.26     | 0.09     | 0.18     | 0.18     |                             |             |             |             |             |
| Usual-DR        | 0.02                     | 0.01     | 0.01     | 0.02     | 0.02     | 0.10                        | 0.05        | 0.07        | 0.11        | 0.09        |
| Improved-DR     | 0.04                     | 0.02     | 0.03     | 0.02     | 0.02     | 0.09                        | 0.10        | 0.07        | 0.12        | 0.09        |
| Aug-Improved-DR | 0.02                     | 0.01     | 0.01     | 0.02     | 0.02     | 0.09                        | 0.12        | 0.08        | 0.11        | 0.10        |
